# Supplementary material for: TRIM7 ubiquitinates SARS-CoV-2 membrane protein to limit apoptosis and viral replication
Source: PubMed Central journal article supplement — Nat Commun. 2024 Nov 30;15:10438. doi: 10.1038/s41467-024-54762-5 (PMC11608229; doi:10.1038/s41467-024-54762-5), 2024-11-30

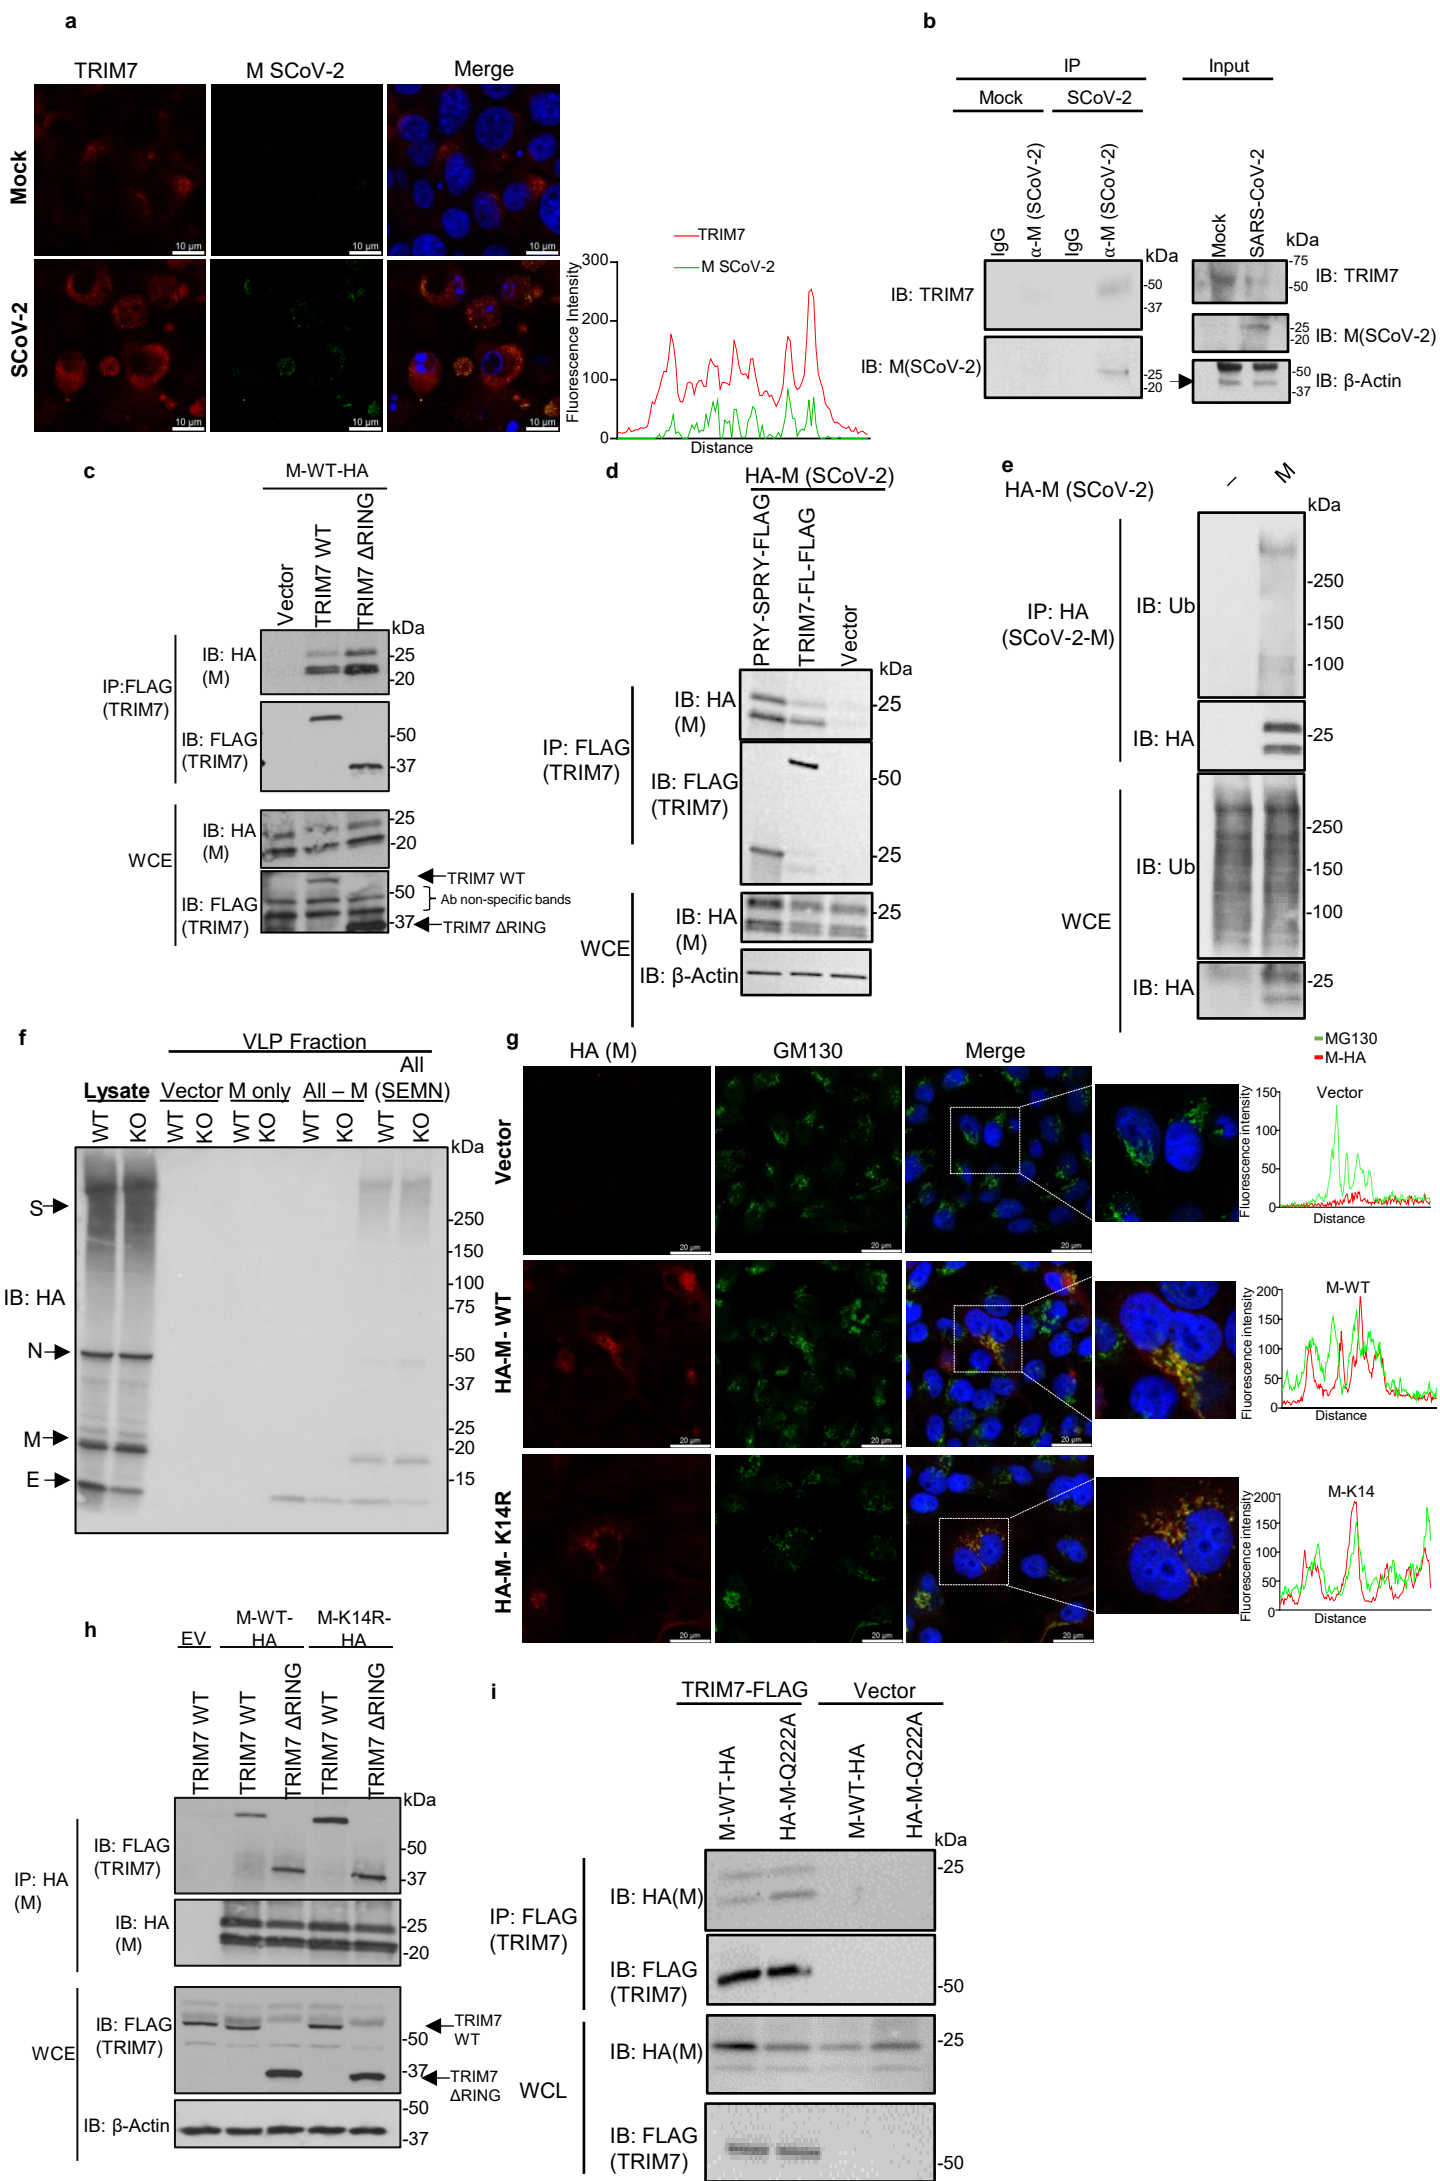

**Figure S1. TRIM7 interaction with SCoV-2 Membrane protein through its PRY-SPRY domain does not require M degron signal and does not affect VLP budding.** a) Confocal microscopy of Vero E6 cells infected with SARS-CoV-2 (SCoV-2) MOI2 48h after infection and stained with anti-TRIM7 or anti-M SCoV-2 (4 micrographs per condition, scale bar 10 $\mu$ m). b) Immunoprecipitation of M SCoV-2 from lung homogenates of WT mice mock or infected with SARS-CoV-2 3 days after infection. HEK 293T cells transfected with c) 200ng or TRIM7 WT or  $\Delta$ RING-FLAG and 100ng of M-HA and immunoprecipitated with FLAG beads, or d) TRIM7-PRY-SPRY domain (PRY-SPRY-FLAG). e) 200ng of M-HA and immunoprecipitated using HA beads f) VLPs in supernatant released by A549 WT and TRIM7 KO cells (KO) cells where transfected with plasmids for the expression of Spike (S), Membrane (M), Envelope (E) and Nucleocapsid (N). All-M means plasmids for SEN were expressed, ALL SEM means plasmids for all the structural proteins were expressed. g) Confocal microscopy of HeLa cells expressing M-WT-HA or M-K14R-HA (Red) and label with anti-MG130 (Golgi Marker) for 24 hours (representative of 2 experiments 2 micrographs per condition, scale bar 20 $\mu$ m). The colocalization profile bottom shows the fluorescence intensity. h) 200ng or TRIM7 WT or  $\Delta$ RING-FLAG and 100ng of M-HA (WT or K14R) and immunoprecipitated with HA beads. i) HEK 293T cells transfected with M WT or M Q222A mutant and TRIM7 WT-FLAG, and immunoprecipitated using FLAG beads. All blot panels are representative of at least 2 independent experiment.

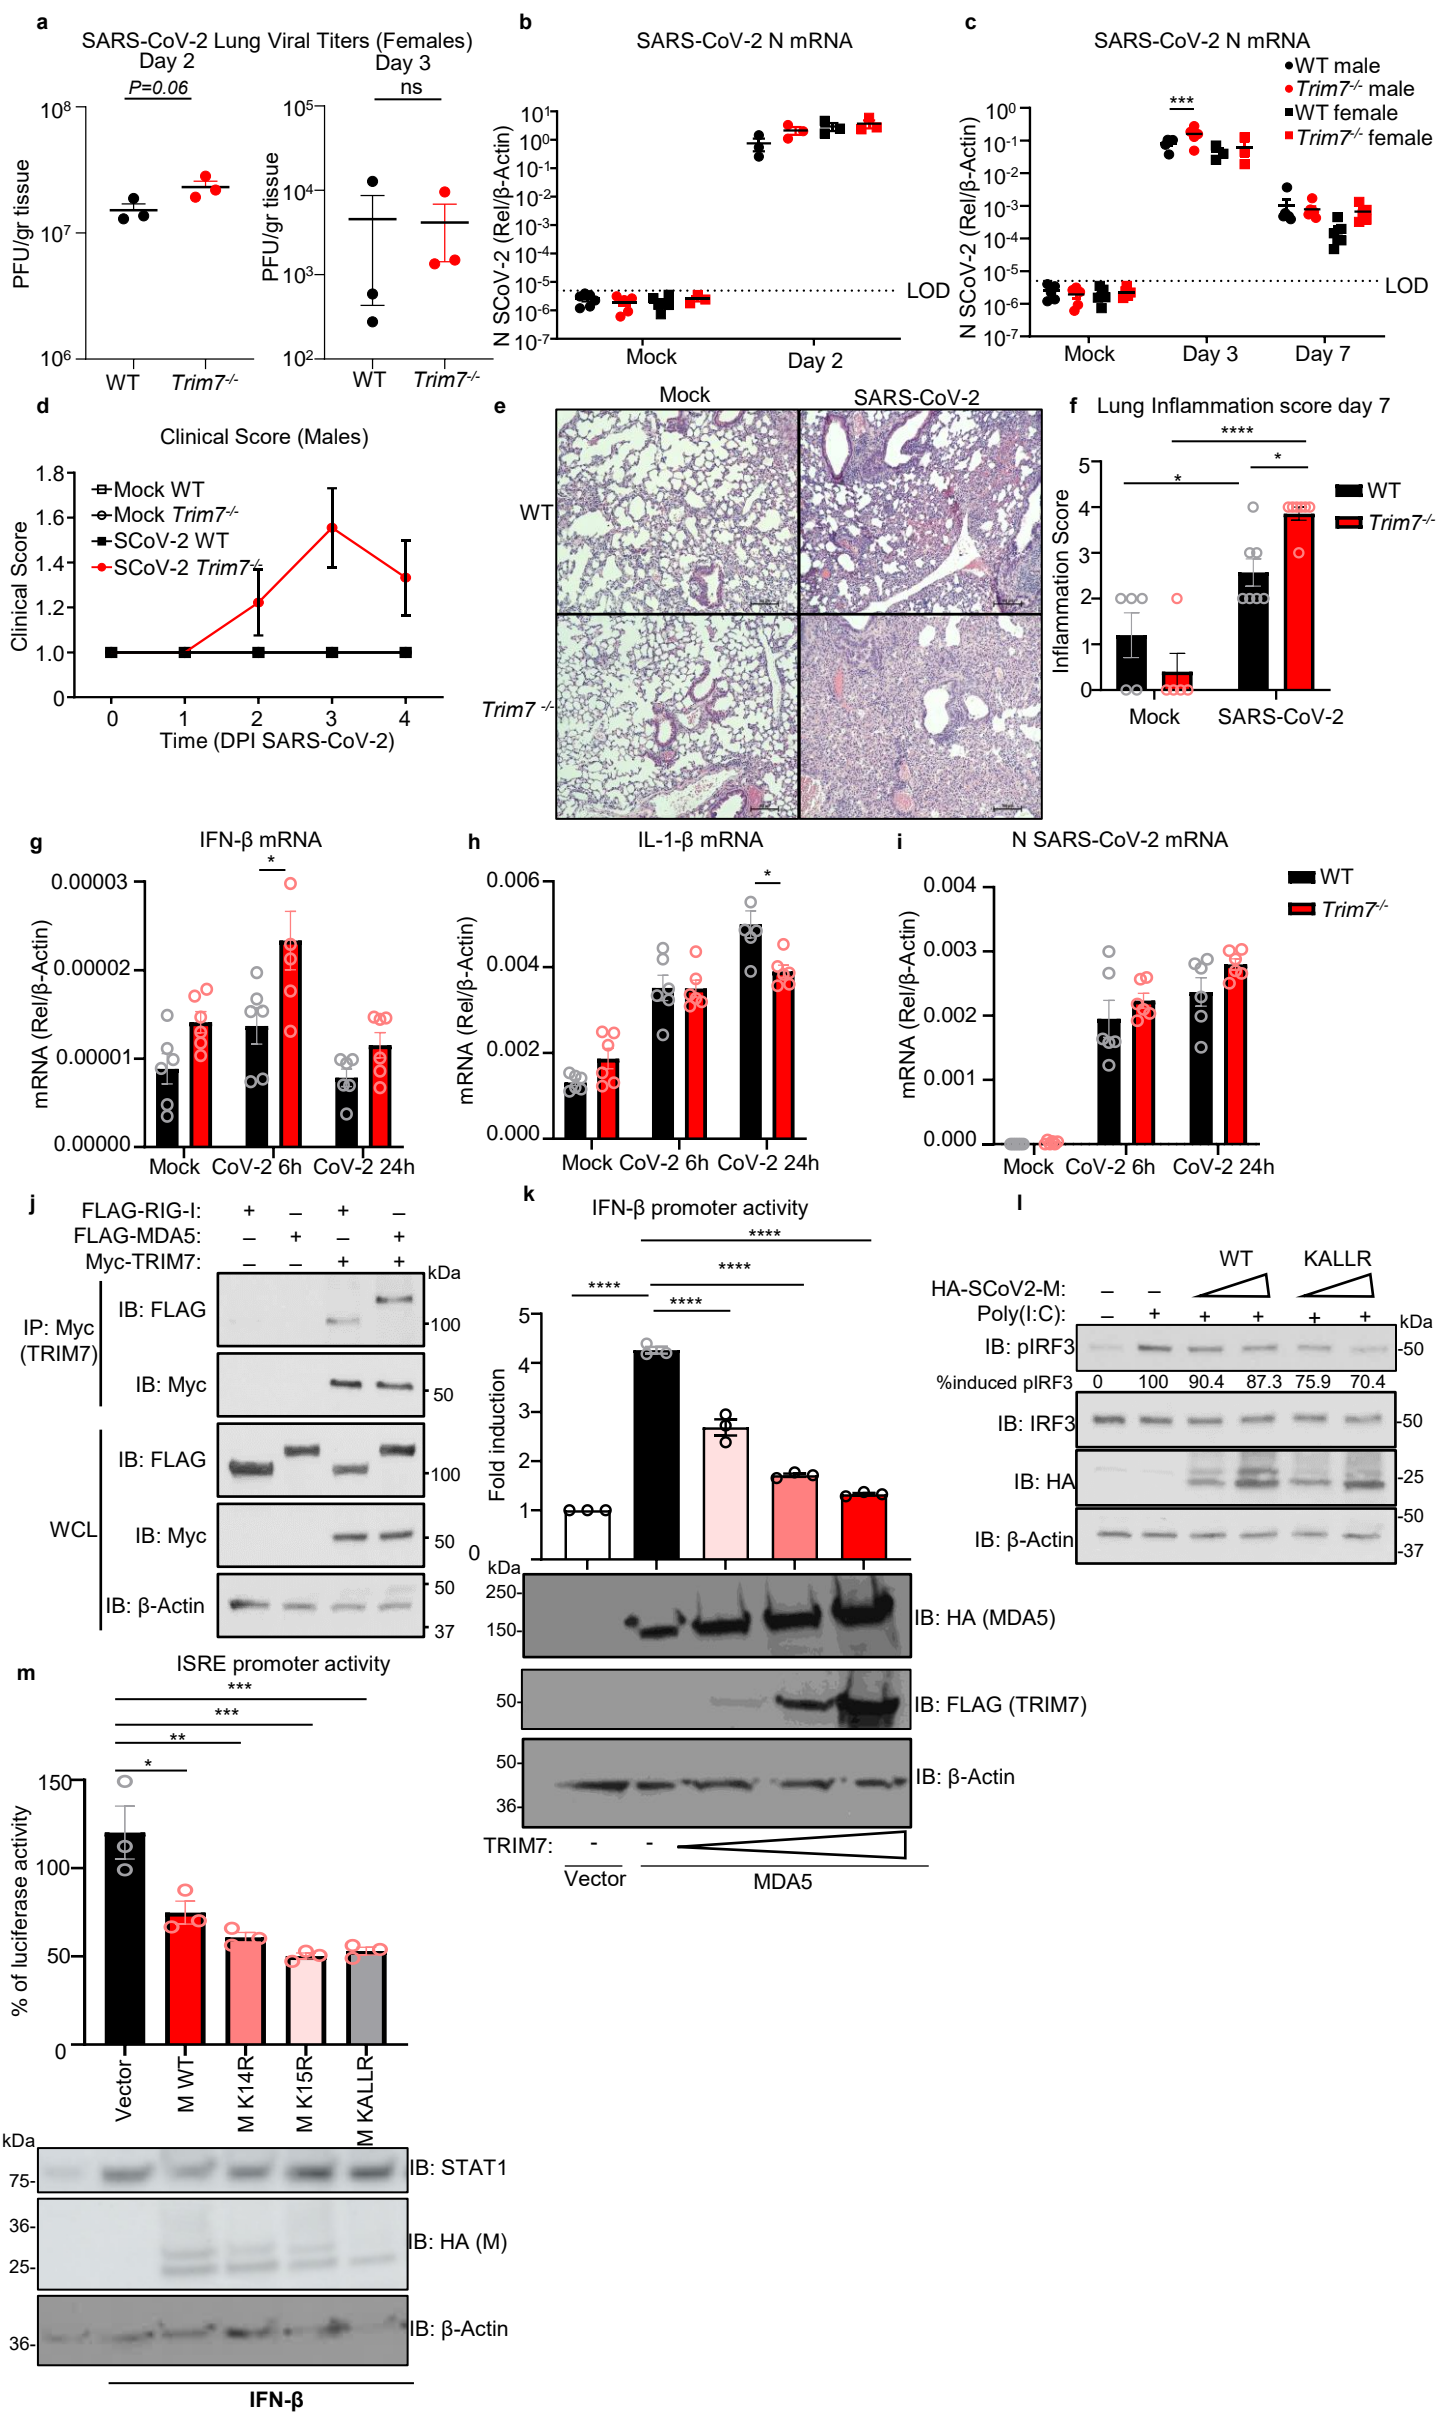

**Figure S2. *Trim7*<sup>-/-</sup> mice showed increased virus titer and inflammation in the lung and ubiquitination of M does not affect IFN-I antagonism.** a) lung viral titers at day 2 and day 3 post-infection calculated as per gram of tissue. b-c) viral RNA expression of SARS-CoV-2 N in lung of WT and *Trim7*<sup>-/-</sup> mice infected with SARS-CoV-2 at day 2, 3 and 7 post-infection (as described in main figure 2e-g), two-way Tukey's multiple comparisons tests (\*\* $p=0.004$ ). d) clinical score of WT and *Trim7*<sup>-/-</sup> males infected with SARS-CoV-2 scored as follow: (1) healthy; (2) Ruffled fur; (3) score 2 +Hunched posture; (4) Weight loss over 20% of initial weight. e) histology analysis of lung of WT and *Trim7*<sup>-/-</sup> mice at day 7 post-infection (mocks n=3 each group, infected WT n=8 and *Trim7*<sup>-/-</sup>n=9) *in vivo* data is representative of at least 3 independent experiments. The inflammatory score was calculated by analyzing the presence of peribronchiolar infiltrates (Yes=1, No=0) plus 1-2 Foci of inflammation (1), 2-3 foci of inflammation (2) and 3+ foci of inflammation (3) for a maximum score of 4) (mocks n=3 males 2 females., infected mice n=4 males and 3 females each group). f) inflammation score two-way Tukey's multiple comparisons tests (\* $p=0.03$ , \*\*\*\* $p<0.0001$ ). qPCR analysis of bone-marrow derived DCs from WT and *Trim7*<sup>-/-</sup> mice infected with SARS-CoV-2 MOI 1 for 6 and 24h. g) IFN- $\beta$  mRNA. h) IL-1  $\beta$  mRNA two-way Tukey's multiple comparisons tests (\* $p=0.01$  and 0.02). i) N SARS-CoV-2 RNA, data from one independent experiment with 6 biological replicates (n=3 males and 3 females). j) Co-immunoprecipitation of TRIM7 and MDA5 or RIG-I. k) IFN- $\beta$  Luciferase reporter assay of HEK 293T cells transfected with MDA5 and increasing concentrations of TRIM7 0,20,40 and 80ng, one-way Tukey's multiple comparisons tests (\*\*\*\* $p<0.0001$ ) representative of 2 independent experiments. l) western blot analysis of phosphorylation of IRF3 induced by stimulation of Poly (I:C) in cells transfected with increasing concentrations of M-WT or KallR mutant. m) ISRE luciferase reporter assay of cells transfected with M-WT or mutants K14R, K15R or KallR stimulated with IFN-  $\beta$  for 24h, one-way Tukey's multiple comparisons tests (\* $p=0.01$ , \*\* $p=0.001$ , \*\*\* $p=0.0005$ , 0.0006) representative of 2 independent experiments.

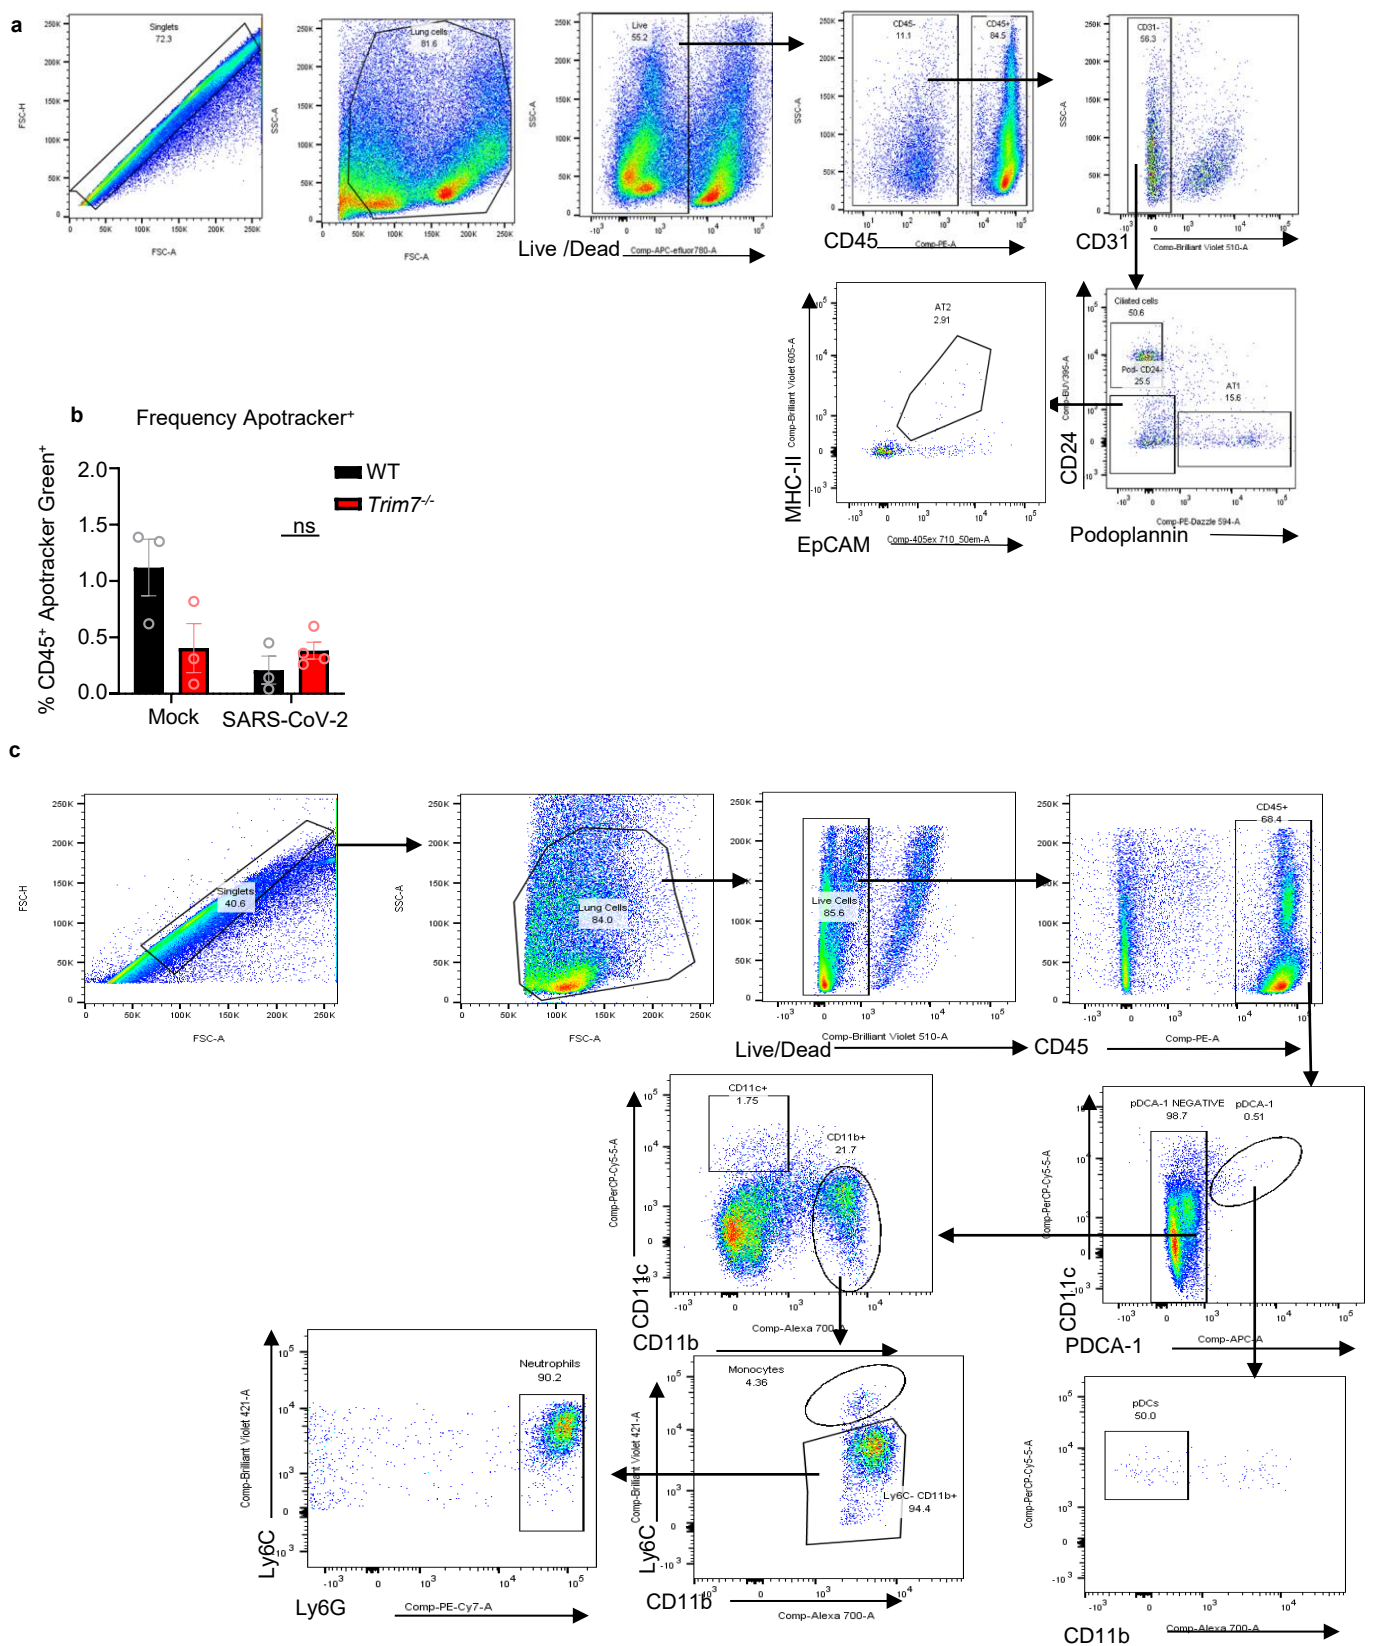

**Figure S3. Flow cytometry gating strategy.** a) flow cytometry gating strategy for lung epithelial cells corresponding to data shown in main figures 3b-c. b) frequency of cells CD45<sup>+</sup> Apotracker<sup>+</sup> in lung of mice infected with SARS-CoV-2 at day 3 post-infection. c) gating strategy for flow cytometry analysis of innate immune cells corresponding to the data shown in main figures 3d-e.

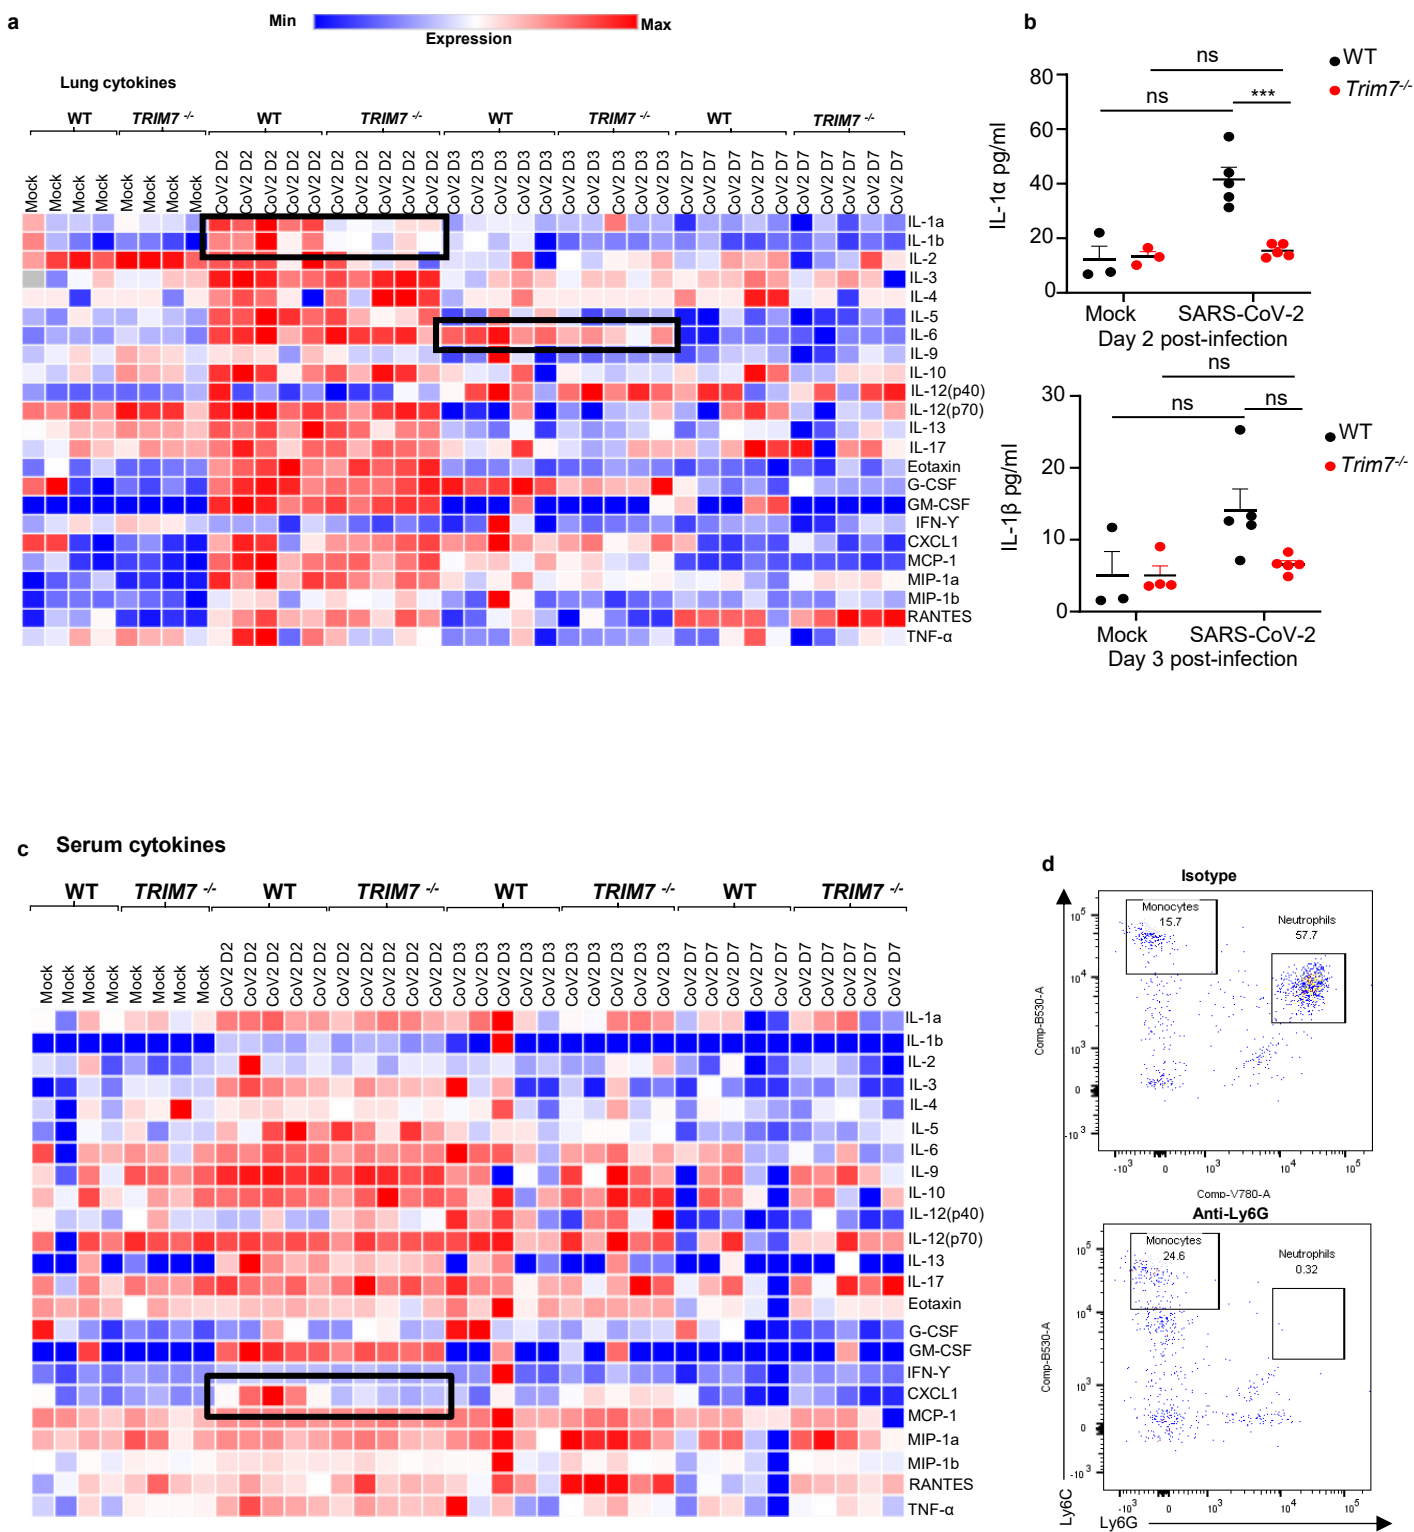

**Figure S4. Multiplex analysis of lung homogenates and serum from infected WT and *Trim7*<sup>-/-</sup> mice.** a) heat map of cytokine expression in lung of infected mice (mocks n=2 males 2 females, infected groups n=2 females 3 males each group). b) lung homogenate concentration levels of IL-1 $\alpha$  and IL-1 $\beta$  in lung of WT and *Trim7*<sup>-/-</sup> mice two-way Tukey's multiple comparisons tests (\*\* $p=0.0004$ ). c) heat map of cytokine expression in serum of infected mice. d) representative dot blot of peripheral blood staining showing depletion of neutrophils CD45<sup>+</sup> CD11c<sup>-</sup> CD11b<sup>+</sup> Ly6C<sup>int</sup>, Ly6G<sup>hi</sup> (corresponding to depletion on main figure 3k-m). Data are depicted as Mean  $\pm$  SEM.

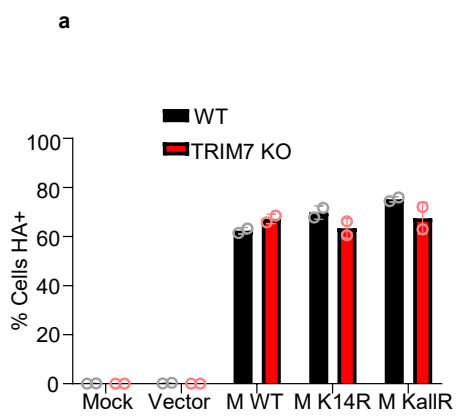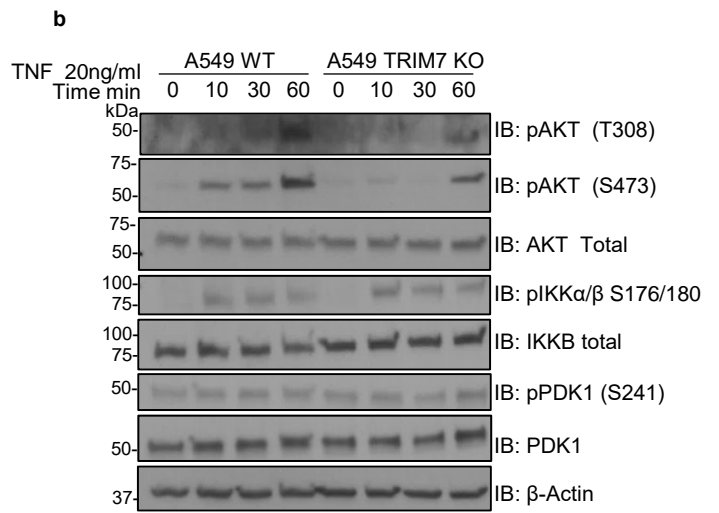

**Figure S5. TRIM7 KO cells showed impaired activation of AKT pathway after TNF stimulation.** a) frequency of cells transfected with M-WT, M-K14R and M-KallR (Corresponding to transfections in main figure 4a-b). b) western blot of A549 WT and TRIM7 KO starved for 8h and then stimulated with 20ng/ml of TNF for 10, 30 and 60 minutes. Representative of 2 independent experiments with similar results.

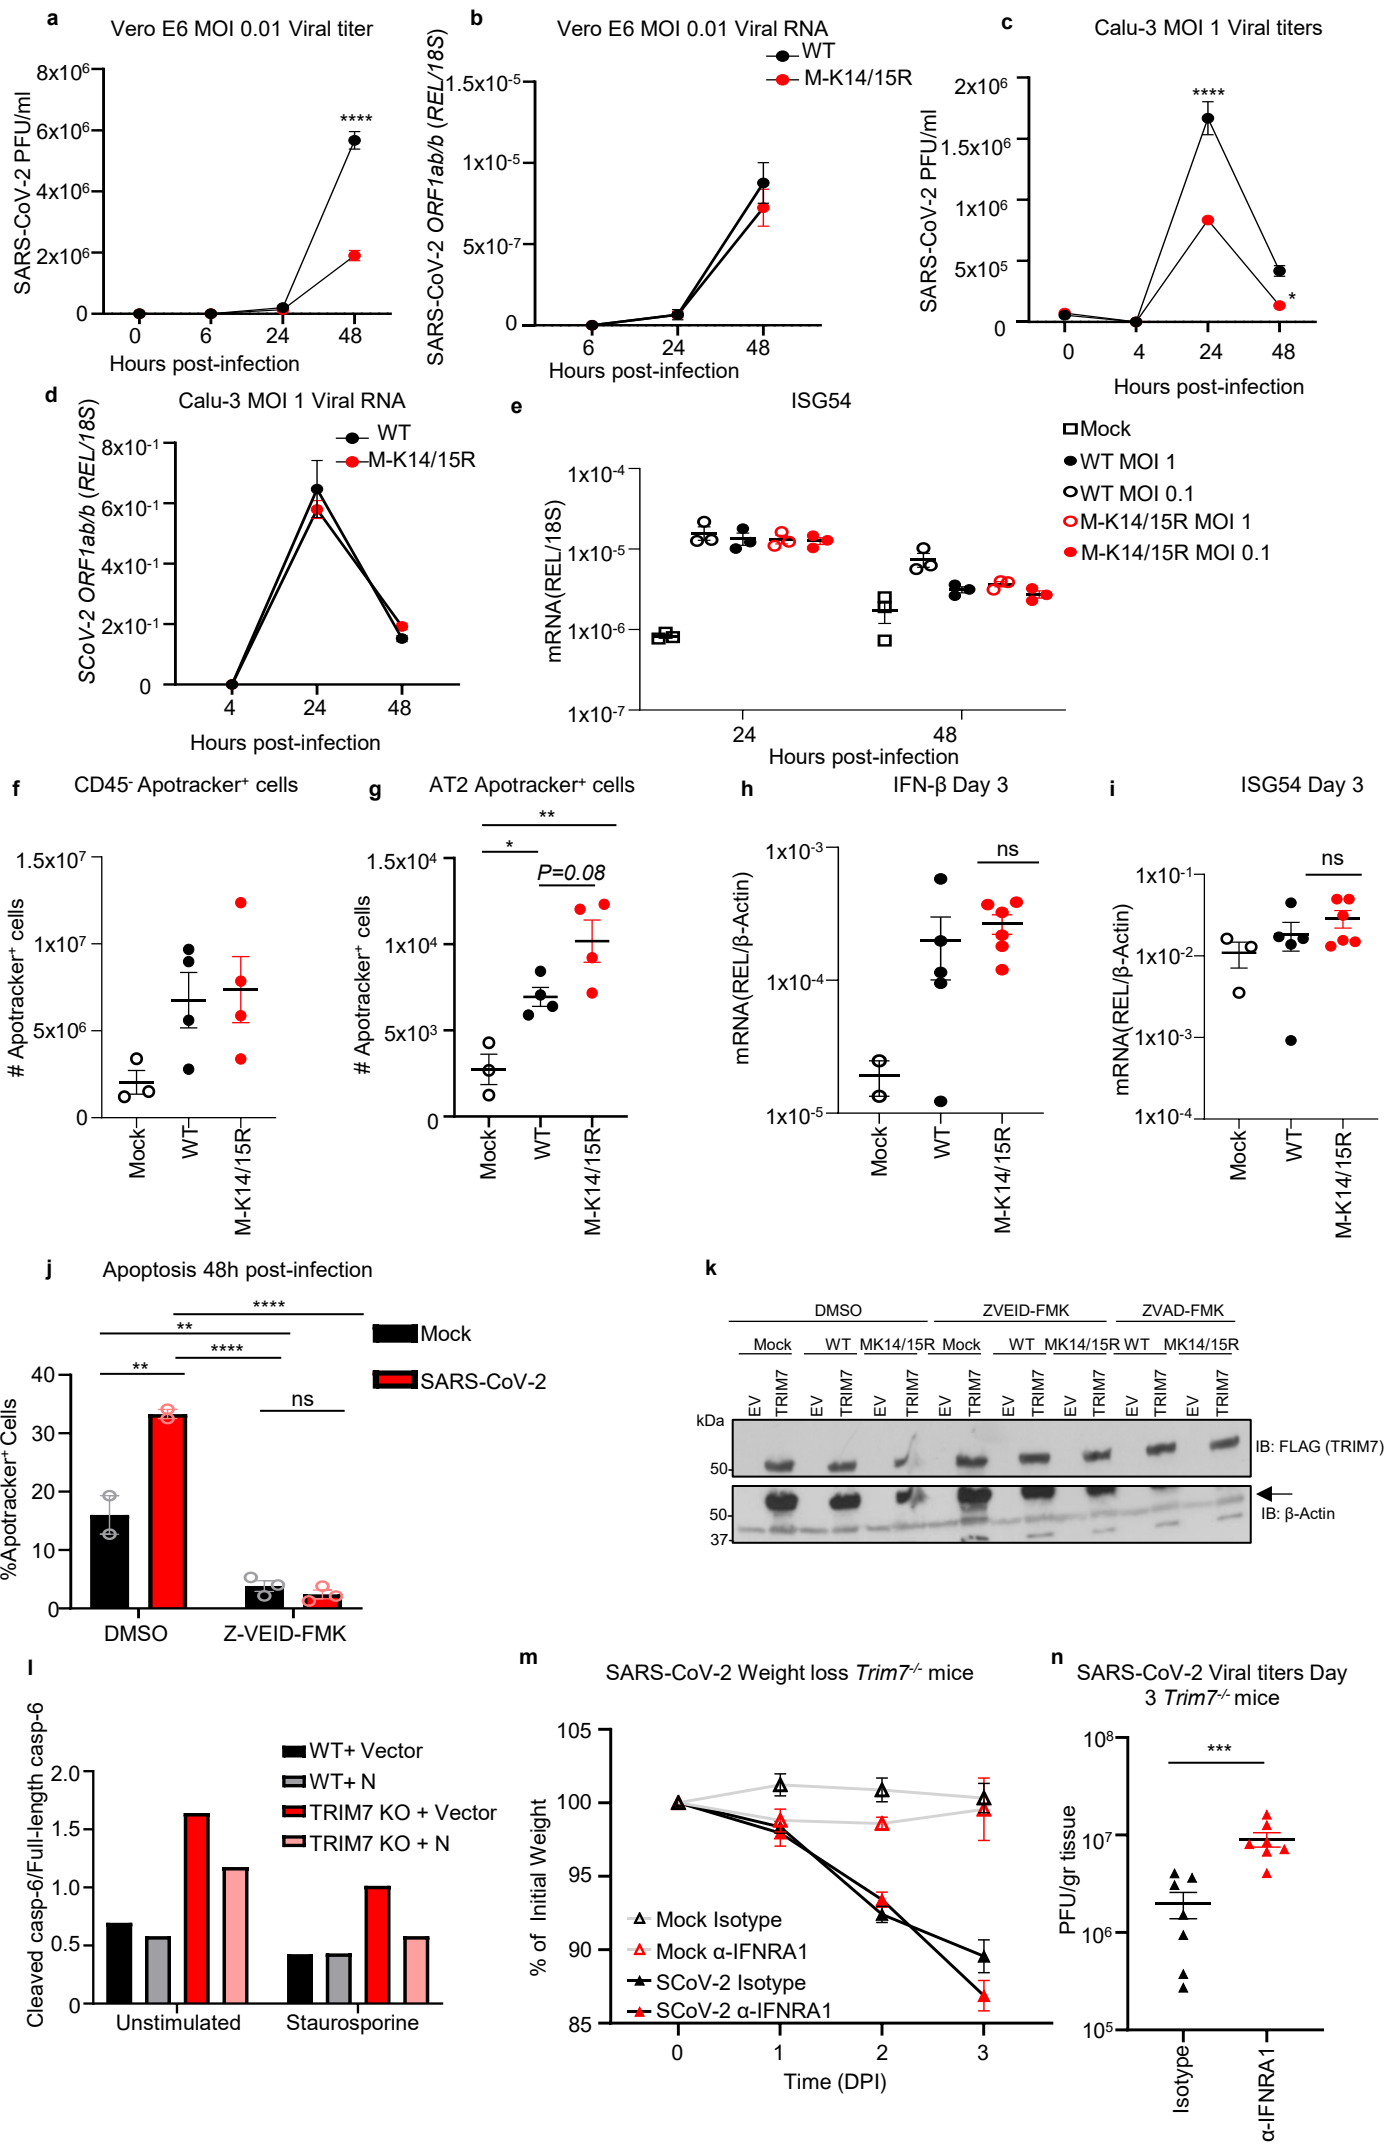



**Figure S6. M-K14/15R virus show impaired replication but increased apoptosis via caspase-6 and is IFN-I independent.** Vero E6 and Calu-3 infected with SARS-CoV-2 WT and M-K14/K15R MOI of 0.01 and 1 respectively. a) viral titers and (b) viral RNA in Vero E6, two-way Tukey's multiple comparisons tests (\*\*\*\* $p < 0.0001$ ). c) viral titers and (d) viral RNA in Calu-3, two-way Tukey's multiple comparisons tests (\*\*\*\* $p < 0.0001$ , \* $p = 0.02$ ). e) ISG54 expression in Calu-3 cells. WT mice infected with WT or M-K14/15R. f) lung CD45<sup>-</sup> cells Apotracker<sup>+</sup> and g) lung Alveolar Type 2 (AT2) cells (CD45<sup>-</sup> CD31<sup>-</sup> CD24<sup>-</sup> Podoplanin<sup>-</sup> EpCAM<sup>+</sup> MHC-II<sup>+</sup>) positive for Apotracker staining, one-way Tukey's multiple comparisons tests (\* $p = 0.03$ \*\*\* $p = 0.001$ ). h) mRNA levels of IFN- $\beta$ , and i) IS54. j) frequency of HEK 293T-hACE-2 cells infected with SARS-CoV-2 and treated with vehicle or 50 $\mu$ M of Z-VEID-FMK stained with Apotracker Green 48h post-infection, one-way Tukey's multiple comparisons tests (\*\* $p = 0.001, 0.006$ , \*\*\*\* $p < 0.0001$ ). k) western blot analysis of expression of TRIM7-FLAG in 293T cells infected with CoV-2 WT and M-K14/K15R MOI 0.1 and treated with caspases inhibitors Z-VEID and Z-VAD (representative of at least 2 independent experiments). l) densitometry analysis from immunoblot shown in main figure 6B of cleaved caspase-6 in A549 WT and TRIM7 KO transfected with empty vector or SARS-CoV-2 N protein. m-n) *Trim7*<sup>-/-</sup> mice treated with anti-IFNRA1 or isotype mock (n=3 males each group) at day 1 before infection and infected intranasal with SARS-CoV-2 CMA3p20 (n=7, 5 females and 2 males) for 3 days as described in main figure 2h. m) weight loss and n) Viral lung titers Two-tailed T-test analysis (\*\*\* $p = 0.0005$ ). Data are depicted as Mean  $\pm$  SEM.

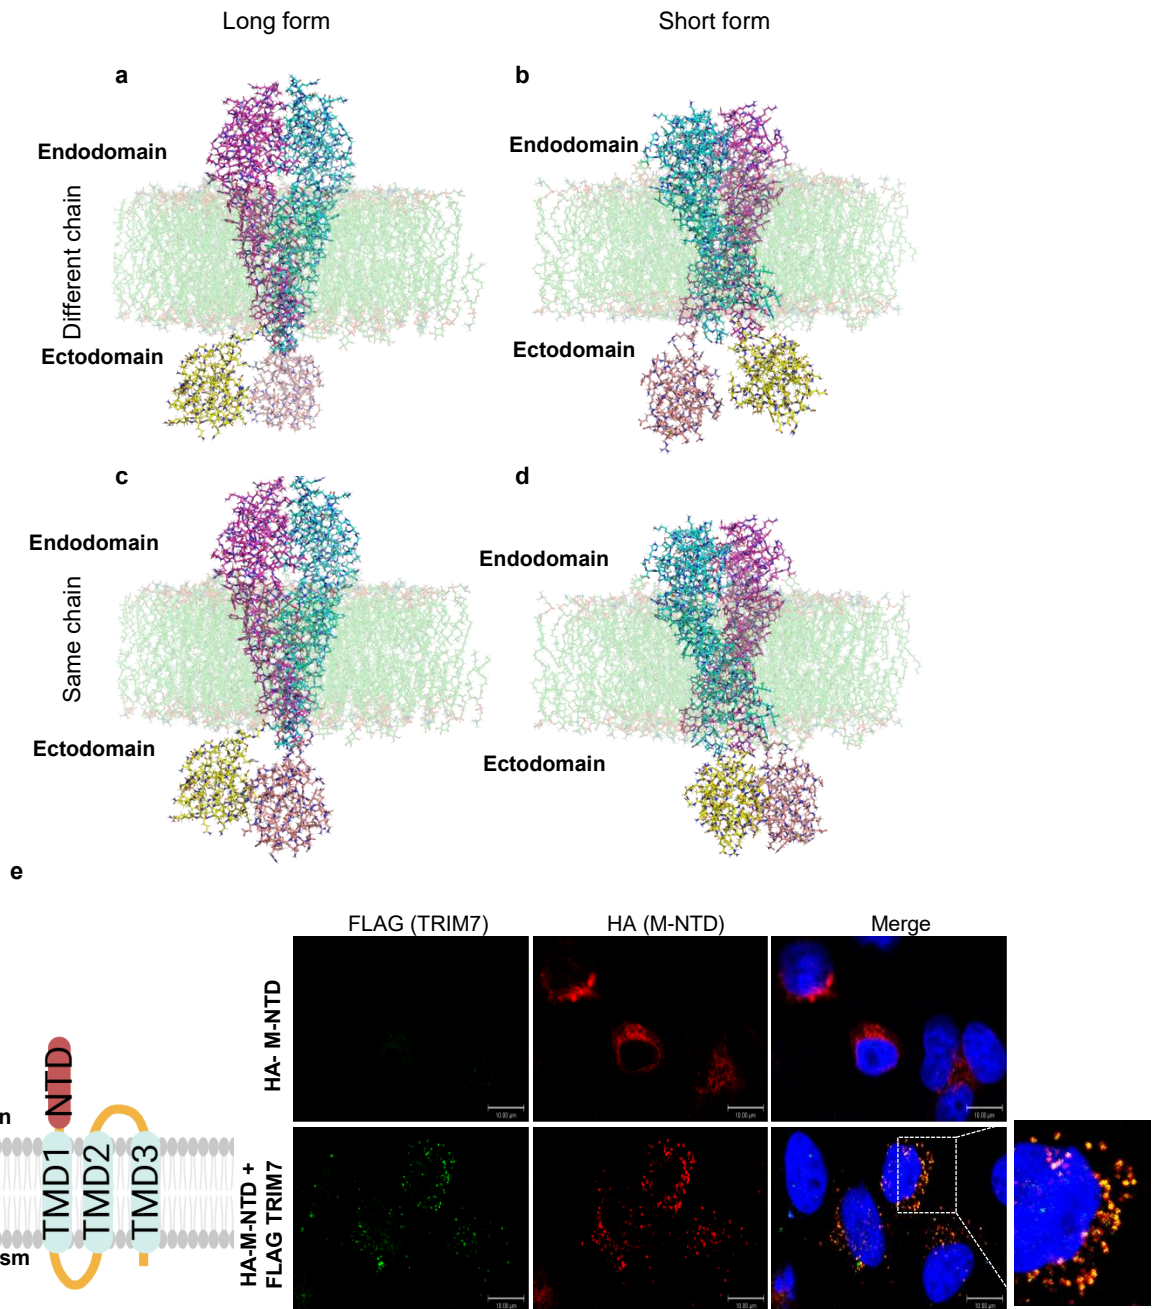

**Figure S7. Structural modeling of M and microscopy studies suggests TRIM7 interacts in the lumen.** Modeling of different possible ubiquitinated M dimers. The two chains of the M homodimer are shown in cyan and magenta whereas ubiquitin (Ub) is presented in yellow and salmon (the membrane is shown in green). a) Long form of M (PDB 7VGR) with Ub attached to K14 and K15 in different chains. b) Short form of M (PDB 7VGS) with Ub attached to K14 and K15 in different chains. c) Long form of M with Ub attached to K14 and K15 in the same chain. d) Short form of M with Ub attached to K14 and K15 of the same chain. Energetically based on the estimations with Surfaces, model A is the most favorable of the four, with full system  $\Delta\Delta G$  calculations showing  $\Delta\Delta G_{A \rightarrow B} = 3.89$  kcal/mol,  $\Delta\Delta G_{A \rightarrow C} = 1.01$  kcal/mol,  $\Delta\Delta G_{C \rightarrow D} = 5.12$  kcal/mol, and  $\Delta\Delta G_{B \rightarrow D} = 2.24$  kcal/mol. In both cases (double ubiquitination in the same, or different chains), the long form is preferred. e) left schematic representation of M-NTD truncation, right panel confocal microscopy of HeLa cells transfected with M-NTD-HA and TRIM7-FLAG for 24h (representative of at least 3 micrographs per condition, scale bar 10 μm).

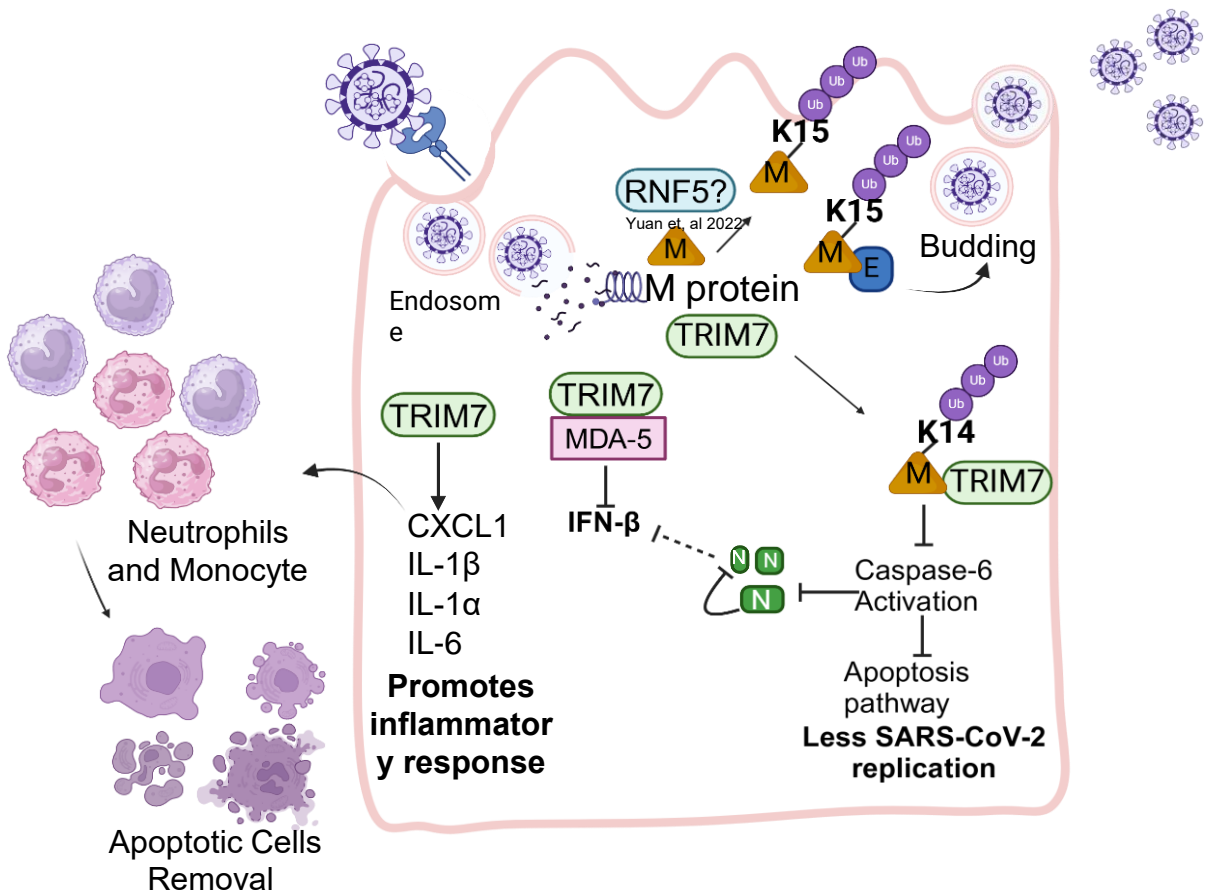

**Figure S8. Multifunctional role of TRIM7 during SARS-CoV-2 infection.** M protein can be ubiquitinated possibly by RNF5 on K15 residue, this is important for virus budding. On the other hand, TRIM7 can ubiquitinate M protein in the K14 residue, this ubiquitination is important to regulate caspase-6 activation and to inhibit apoptosis as well as to reduce the cleavage of N that could in turn inhibit the IFN-I production. TRIM7 can also interact with cytosolic receptor MDA-5 and inhibit the promoter activity of IFN-β by a mechanism that still unknown. TRIM7 is important to promote the production of pro-inflammatory cytokines IL-6, IL-1β and IL-1α as well as the chemokine CXCL1 that recruits neutrophils and monocytes to the lung, here these cells promote the removal of the apoptotic cells induced by SARS-CoV-2 and contribute with tissue repair. Created with BioRender.com.

**Table S1. Mutations on Membrane protein K14 residue across clades.**

| Clade | Residue Mutation | Sample Mutation count | Total Samples in Clade | Clade mutation % | Total Mutations | Clade Total Mutations % |
|-------|------------------|-----------------------|------------------------|------------------|-----------------|-------------------------|
| 19A   | K14del           | 113                   | 11833                  | 0.955            | 113             | 0.955                   |
| 19B   | K14del           | 11                    | 7387                   | 0.1489           | 11              | 0.149                   |
| 20A   | K14R             | 3                     | 120679                 | 0.0025           | 274             | 0.227                   |
| 20A   | K14E             | 1                     | 120679                 | 0.0008           | 274             | 0.227                   |
| 20A   | K14del           | 270                   | 120679                 | 0.2237           | 274             | 0.227                   |
| 20B   | K14R             | 3                     | 104912                 | 0.0029           | 137             | 0.131                   |
| 20B   | K14del           | 134                   | 104912                 | 0.1277           | 137             | 0.131                   |
| 21A   | K14E             | 2                     | 53799                  | 0.0037           | 2               | 0.004                   |
| 20E   | K14E             | 4                     | 103929                 | 0.0038           | 8               | 0.008                   |
| 20E   | K14del           | 4                     | 103929                 | 0.0038           | 8               | 0.008                   |
| 20C   | K14E             | 8                     | 68701                  | 0.0116           | 54              | 0.079                   |
| 20C   | K14F             | 1                     | 68701                  | 0.0015           | 54              | 0.079                   |
| 20C   | K14R             | 1                     | 68701                  | 0.0015           | 54              | 0.079                   |
| 20C   | K14del           | 44                    | 68701                  | 0.064            | 54              | 0.079                   |
| 21H   | K14E             | 5                     | 6144                   | 0.0814           | 5               | 0.081                   |
| 21B   | K14R             | 1                     | 1045                   | 0.0957           | 1               | 0.096                   |
| 20I   | K14*             | 1                     | 651108                 | 0.0002           | 23              | 0.004                   |
| 20I   | K14R             | 5                     | 651108                 | 0.0008           | 23              | 0.004                   |
| 20I   | K14Q             | 1                     | 651108                 | 0.0002           | 23              | 0.004                   |
| 20I   | K14E             | 5                     | 651108                 | 0.0008           | 23              | 0.004                   |
| 20I   | K14G             | 1                     | 651108                 | 0.0002           | 23              | 0.004                   |
| 20I   | K14del           | 7                     | 651108                 | 0.0011           | 23              | 0.004                   |
| 20I   | K14T             | 3                     | 651108                 | 0.0005           | 23              | 0.004                   |
| 20D   | K14del           | 9                     | 6020                   | 0.1495           | 9               | 0.15                    |
| 21I   | K14E             | 2                     | 151093                 | 0.0013           | 7               | 0.005                   |
| 21I   | K14R             | 1                     | 151093                 | 0.0007           | 7               | 0.005                   |
| 21I   | K14del           | 4                     | 151093                 | 0.0026           | 7               | 0.005                   |
| 21J   | K14I             | 8                     | 2737780                | 0.0003           | 111             | 0.004                   |
| 21J   | K14R             | 15                    | 2737780                | 0.0005           | 111             | 0.004                   |
| 21J   | K14Q             | 8                     | 2737780                | 0.0003           | 111             | 0.004                   |
| 21J   | K14E             | 60                    | 2737780                | 0.0022           | 111             | 0.004                   |
| 21J   | K14del           | 19                    | 2737780                | 0.0007           | 111             | 0.004                   |
| 21J   | K14T             | 1                     | 2737780                | 0                | 111             | 0.004                   |
| 20H   | K14R             | 14                    | 9553                   | 0.1466           | 16              | 0.167                   |
| 20H   | K14del           | 2                     | 9553                   | 0.0209           | 16              | 0.167                   |
| 21F   | K14R             | 1                     | 33858                  | 0.003            | 2               | 0.006                   |
| 21F   | K14del           | 1                     | 33858                  | 0.003            | 2               | 0.006                   |
| 21C   | K14E             | 1                     | 41628                  | 0.0024           | 1               | 0.002                   |
| 21K   | K14E             | 8                     | 1591473                | 0.0005           | 70              | 0.004                   |
| 21K   | K14G             | 1                     | 1591473                | 0.0001           | 70              | 0.004                   |
| 21K   | K14del           | 54                    | 1591473                | 0.0034           | 70              | 0.004                   |
| 21K   | K14R             | 7                     | 1591473                | 0.0004           | 70              | 0.004                   |
| 21L   | K14E             | 2                     | 1143006                | 0.0002           | 57              | 0.005                   |
| 21L   | K14del           | 46                    | 1143006                | 0.004            | 57              | 0.005                   |
| 21L   | K14T             | 5                     | 1143006                | 0.0004           | 57              | 0.005                   |
| 21L   | K14R             | 4                     | 1143006                | 0.0003           | 57              | 0.005                   |
| 22D   | K14Q             | 1                     | 31187                  | 0.0032           | 2               | 0.006                   |
| 22D   | K14R             | 1                     | 31187                  | 0.0032           | 2               | 0.006                   |
| 22F   | K14R             | 2                     | 20443                  | 0.0098           | 2               | 0.01                    |
| 22C   | K14R             | 1                     | 170929                 | 0.0006           | 4               | 0.002                   |
| 22C   | K14E             | 1                     | 170929                 | 0.0006           | 4               | 0.002                   |
| 22C   | K14G             | 1                     | 170929                 | 0.0006           | 4               | 0.002                   |
| 22C   | K14del           | 1                     | 170929                 | 0.0006           | 4               | 0.002                   |
| 22B   | K14E             | 4                     | 781430                 | 0.0005           | 57              | 0.007                   |
| 22B   | K14del           | 10                    | 781430                 | 0.0013           | 57              | 0.007                   |
| 22B   | K14R             | 43                    | 781430                 | 0.0055           | 57              | 0.007                   |
| 23C   | K14R             | 1                     | 28556                  | 0.0035           | 1               | 0.004                   |
| 23A   | K14E             | 1                     | 161212                 | 0.0006           | 3               | 0.002                   |
| 23A   | K14R             | 2                     | 161212                 | 0.0012           | 3               | 0.002                   |
| 23B   | K14R             | 2                     | 31125                  | 0.0064           | 2               | 0.006                   |
| 23E   | K14E             | 1                     | 11253                  | 0.0089           | 7               | 0.062                   |
| 23E   | K14R             | 6                     | 11253                  | 0.0533           | 7               | 0.062                   |
| 22E   | K14R             | 5                     | 195894                 | 0.0026           | 6               | 0.003                   |
| 22E   | K14del           | 1                     | 195894                 | 0.0005           | 6               | 0.003                   |

**Table S2. Mutations on Membrane protein K15 residue across clades.**

| Clade | Residue Mutation | Sample Mutation count | Total Samples in Clade | Clade Individual mutation % | Total Mutations | Clade Total Mutation % |
|-------|------------------|-----------------------|------------------------|-----------------------------|-----------------|------------------------|
| 19A   | K15*             | 3                     | 11833                  | 0.0254                      | 4               | 0.034                  |
| 19A   | K15N             | 1                     | 11833                  | 0.0085                      | 4               | 0.034                  |
| 20A   | K15M             | 2                     | 120679                 | 0.0017                      | 19              | 0.016                  |
| 20A   | K15E             | 8                     | 120679                 | 0.0066                      | 19              | 0.016                  |
| 20A   | K15S             | 3                     | 120679                 | 0.0025                      | 19              | 0.016                  |
| 20A   | K15R             | 1                     | 120679                 | 0.0008                      | 19              | 0.016                  |
| 20A   | K15del           | 5                     | 120679                 | 0.0041                      | 19              | 0.016                  |
| 19B   | K15del           | 1                     | 7387                   | 0.0135                      | 35              | 0.474                  |
| 19B   | K15R             | 34                    | 7387                   | 0.4603                      | 35              | 0.474                  |
| 20B   | K15N             | 26                    | 104912                 | 0.0248                      | 32              | 0.031                  |
| 20B   | K15R             | 2                     | 104912                 | 0.0019                      | 32              | 0.031                  |
| 20B   | K15del           | 4                     | 104912                 | 0.0038                      | 32              | 0.031                  |
| 21A   | K15N             | 7                     | 53799                  | 0.013                       | 8               | 0.015                  |
| 21A   | K15E             | 1                     | 53799                  | 0.0019                      | 8               | 0.015                  |
| 20C   | K15N             | 55                    | 68701                  | 0.0801                      | 106             | 0.154                  |
| 20C   | K15R             | 50                    | 68701                  | 0.0728                      | 106             | 0.154                  |
| 20C   | K15E             | 1                     | 68701                  | 0.0015                      | 106             | 0.154                  |
| 21H   | K15N             | 1                     | 6144                   | 0.0163                      | 1               | 0.016                  |
| 20E   | K15N             | 19                    | 103929                 | 0.0183                      | 25              | 0.024                  |
| 20E   | K15T             | 1                     | 103929                 | 0.001                       | 25              | 0.024                  |
| 20E   | K15R             | 2                     | 103929                 | 0.0019                      | 25              | 0.024                  |
| 20E   | K15del           | 3                     | 103929                 | 0.0029                      | 25              | 0.024                  |
| 20J   | K15Q             | 2                     | 29088                  | 0.0069                      | 2               | 0.007                  |
| 20I   | K15M             | 7                     | 651108                 | 0.0011                      | 102             | 0.016                  |
| 20I   | K15N             | 22                    | 651108                 | 0.0034                      | 102             | 0.016                  |
| 20I   | K15E             | 26                    | 651108                 | 0.004                       | 102             | 0.016                  |
| 20I   | K15T             | 1                     | 651108                 | 0.0002                      | 102             | 0.016                  |
| 20I   | K15R             | 40                    | 651108                 | 0.0061                      | 102             | 0.016                  |
| 20I   | K15del           | 6                     | 651108                 | 0.0009                      | 102             | 0.016                  |
| 20D   | K15N             | 1                     | 6020                   | 0.0166                      | 1               | 0.017                  |
| 20D   | K15del           | 1                     | 6020                   | 0.0166                      | 1               | 0.017                  |
| 21I   | K15N             | 4                     | 151093                 | 0.0026                      | 37              | 0.024                  |
| 21I   | K15Q             | 1                     | 151093                 | 0.0007                      | 37              | 0.024                  |
| 21I   | K15E             | 24                    | 151093                 | 0.0159                      | 37              | 0.024                  |
| 21I   | K15del           | 3                     | 151093                 | 0.002                       | 37              | 0.024                  |
| 21I   | K15R             | 5                     | 151093                 | 0.0033                      | 37              | 0.024                  |
| 21J   | K15N             | 2433                  | 2737780                | 0.0889                      | 2785            | 0.102                  |
| 21J   | K15Q             | 165                   | 2737780                | 0.006                       | 2785            | 0.102                  |
| 21J   | K15T             | 7                     | 2737780                | 0.0003                      | 2785            | 0.102                  |
| 21J   | K15R             | 123                   | 2737780                | 0.0045                      | 2785            | 0.102                  |
| 21J   | K15del           | 29                    | 2737780                | 0.0011                      | 2785            | 0.102                  |
| 21J   | K15M             | 11                    | 2737780                | 0.0004                      | 2785            | 0.102                  |
| 21J   | K15E             | 17                    | 2737780                | 0.0006                      | 2785            | 0.102                  |
| 20H   | K15del           | 2                     | 9553                   | 0.0209                      | 3               | 0.031                  |
| 20H   | K15R             | 1                     | 9553                   | 0.0105                      | 3               | 0.031                  |
| 21F   | K15del           | 1                     | 33858                  | 0.003                       | 1               | 0.003                  |
| 21C   | K15N             | 1                     | 41628                  | 0.0024                      | 1               | 0.002                  |
| 20G   | K15N             | 4                     | 83603                  | 0.0048                      | 6               | 0.007                  |
| 20G   | K15R             | 2                     | 83603                  | 0.0024                      | 6               | 0.007                  |
| 21K   | K15T             | 1                     | 1591473                | 0.0001                      | 166             | 0.01                   |
| 21K   | K15N             | 31                    | 1591473                | 0.0019                      | 166             | 0.01                   |
| 21K   | K15R             | 35                    | 1591473                | 0.0022                      | 166             | 0.01                   |
| 21K   | K15Q             | 22                    | 1591473                | 0.0014                      | 166             | 0.01                   |
| 21K   | K15del           | 55                    | 1591473                | 0.0035                      | 166             | 0.01                   |
| 21K   | K15M             | 6                     | 1591473                | 0.0004                      | 166             | 0.01                   |
| 21K   | K15E             | 16                    | 1591473                | 0.001                       | 166             | 0.01                   |
| 21L   | K15N             | 7                     | 1143006                | 0.0006                      | 71              | 0.006                  |
| 21L   | K15R             | 11                    | 1143006                | 0.001                       | 71              | 0.006                  |
| 21L   | K15del           | 52                    | 1143006                | 0.0045                      | 71              | 0.006                  |
| 21L   | K15E             | 1                     | 1143006                | 0.0001                      | 71              | 0.006                  |
| 22D   | K15N             | 5                     | 31187                  | 0.016                       | 7               | 0.022                  |
| 22D   | K15R             | 2                     | 31187                  | 0.0064                      | 7               | 0.022                  |
| 22F   | K15del           | 1                     | 20443                  | 0.0049                      | 5               | 0.024                  |
| 22F   | K15N             | 1                     | 20443                  | 0.0049                      | 5               | 0.024                  |
| 22F   | K15R             | 3                     | 20443                  | 0.0147                      | 5               | 0.024                  |
| 22C   | K15N             | 1                     | 170929                 | 0.0006                      | 7               | 0.004                  |
| 22C   | K15R             | 5                     | 170929                 | 0.0029                      | 7               | 0.004                  |
| 22C   | K15del           | 1                     | 170929                 | 0.0006                      | 7               | 0.004                  |
| 22B   | K15del           | 13                    | 781430                 | 0.0017                      | 106             | 0.014                  |
| 22B   | K15N             | 6                     | 781430                 | 0.0008                      | 106             | 0.014                  |
| 22B   | K15E             | 3                     | 781430                 | 0.0004                      | 106             | 0.014                  |
| 22B   | K15R             | 79                    | 781430                 | 0.0101                      | 106             | 0.014                  |
| 22B   | K15Q             | 5                     | 781430                 | 0.0006                      | 106             | 0.014                  |
| 22A   | K15N             | 1                     | 95899                  | 0.001                       | 1               | 0.001                  |
| 23C   | K15R             | 1                     | 28556                  | 0.0035                      | 1               | 0.004                  |
| 23A   | K15N             | 4                     | 161212                 | 0.0025                      | 11              | 0.007                  |
| 23A   | K15R             | 7                     | 161212                 | 0.0043                      | 11              | 0.007                  |
| 23B   | K15del           | 1                     | 31125                  | 0.0032                      | 1               | 0.003                  |
| 23D   | K15N             | 69                    | 36429                  | 0.1894                      | 72              | 0.198                  |
| 23D   | K15Q             | 1                     | 36429                  | 0.0027                      | 72              | 0.198                  |
| 23D   | K15R             | 1                     | 36429                  | 0.0027                      | 72              | 0.198                  |
| 23D   | K15E             | 1                     | 36429                  | 0.0027                      | 72              | 0.198                  |
| 23E   | K15R             | 7                     | 11253                  | 0.0622                      | 7               | 0.062                  |
| 22E   | K15del           | 1                     | 195894                 | 0.0005                      | 4               | 0.002                  |
| 22E   | K15M             | 1                     | 195894                 | 0.0005                      | 4               | 0.002                  |
| 22E   | K15N             | 1                     | 195894                 | 0.0005                      | 4               | 0.002                  |
| 22E   | K15R             | 1                     | 195894                 | 0.0005                      | 4               | 0.002                  |
| 23F   | K15N             | 1                     | 31861                  | 0.0031                      | 4               | 0.013                  |
| 23F   | K15Q             | 2                     | 31861                  | 0.0063                      | 4               | 0.013                  |
| 23F   | K15R             | 1                     | 31861                  | 0.0031                      | 4               | 0.013                  |

**Table S3. Mutations on Membrane protein K14/K15 residue across clades.**

| Clade | Residue Mutation | Sample Mutation count | Total Samples in Clade | Clade mutation % | Total Mutations | Clade Total Mutations % |
|-------|------------------|-----------------------|------------------------|------------------|-----------------|-------------------------|
| 19B   | K14del, K15del   | 1                     | 11833                  | 0.008            | 1               | 0.008                   |
| 20A   | K14del, K15del   | 4                     | 120679                 | 0.003            | 4               | 0.003                   |
| 20B   | K14del, K15del   | 2                     | 104912                 | 0.002            | 2               | 0.002                   |
| 20I   | K14del, K15del   | 6                     | 651108                 | 0.001            | 6               | 0.001                   |
| 20D   | K14del, K15del   | 1                     | 6020                   | 0.017            | 1               | 0.017                   |
| 20E   | K14del, K15del   | 3                     | 103929                 | 0.003            | 3               | 0.003                   |
| 21I   | K14del, K15del   | 3                     | 151093                 | 0.002            | 3               | 0.002                   |
| 21J   | K14del, K15del   | 19                    | 2737780                | 0.001            | 19              | 0.001                   |
| 20H   | K14del, K15del   | 2                     | 9553                   | 0.021            | 2               | 0.021                   |
| 21F   | K14del, K15del   | 1                     | 33858                  | 0.003            | 1               | 0.003                   |
| 21K   | K14del, K15del   | 51                    | 1591473                | 0.003            | 52              | 0.003                   |
| 21K   | K14R, K15Q       | 1                     | 1591473                | 0                | 52              | 0.003                   |
| 21L   | K14del, K15del   | 45                    | 1143006                | 0.004            | 45              | 0.004                   |
| 22C   | K14del, K15del   | 2                     | 170929                 | 0.001            | 2               | 0.001                   |
| 22B   | K14del, K15del   | 11                    | 781430                 | 0.001            | 11              | 0.001                   |
| 22E   | K14del, K15del   | 1                     | 195894                 | 0.001            | 1               | 0.001                   |

Figure S1b uncropped unprocessed immunoblots

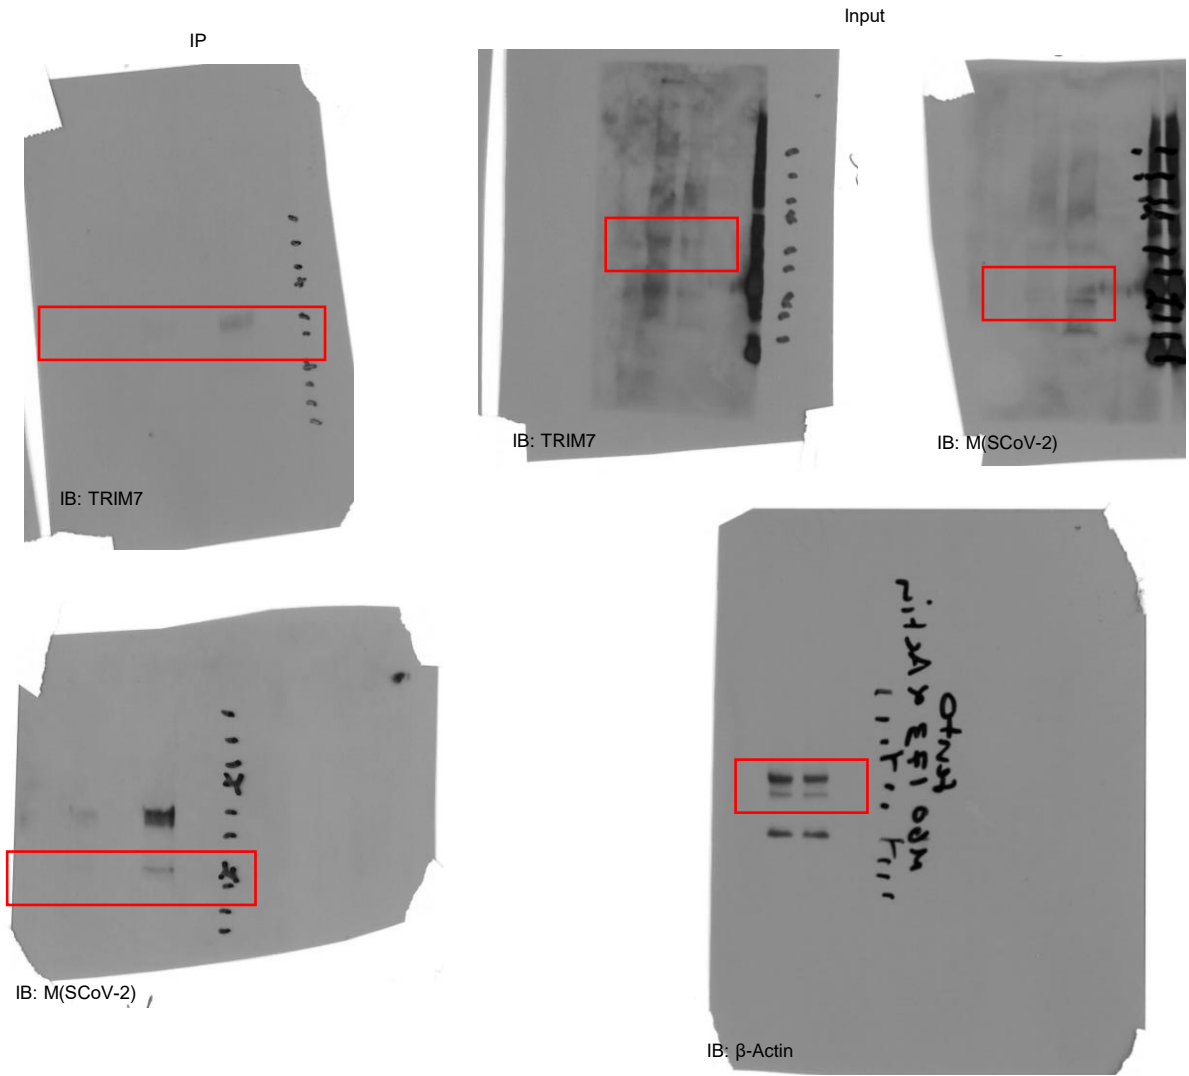

Figure S1c uncropped unprocessed immunoblots

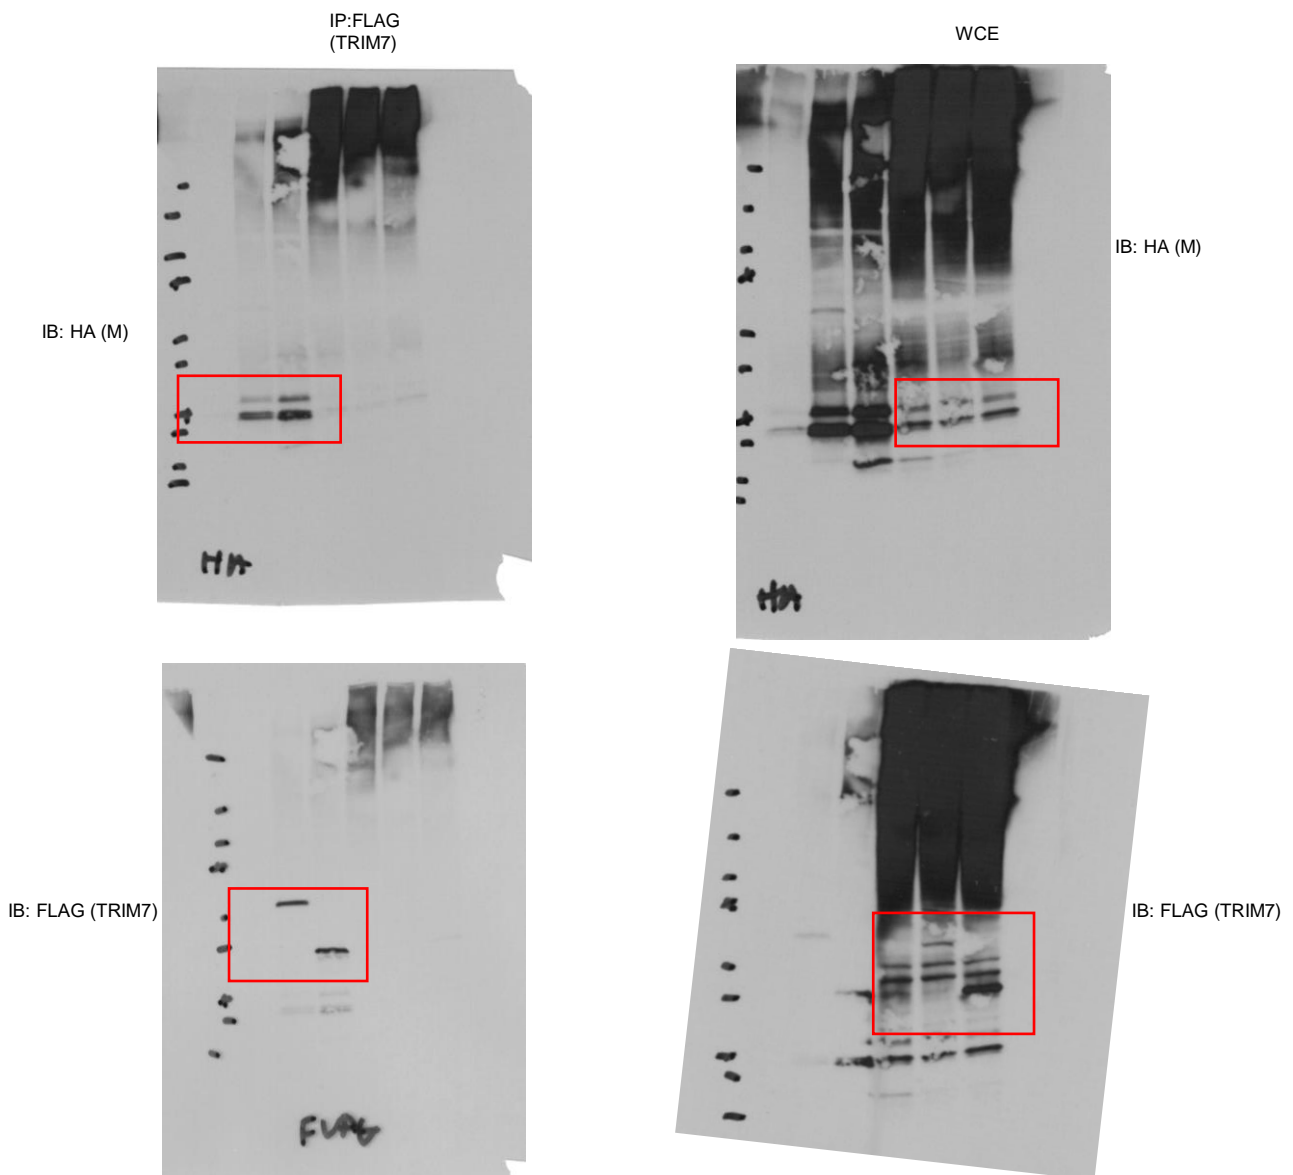

Figure S1d uncropped unprocessed immunoblots

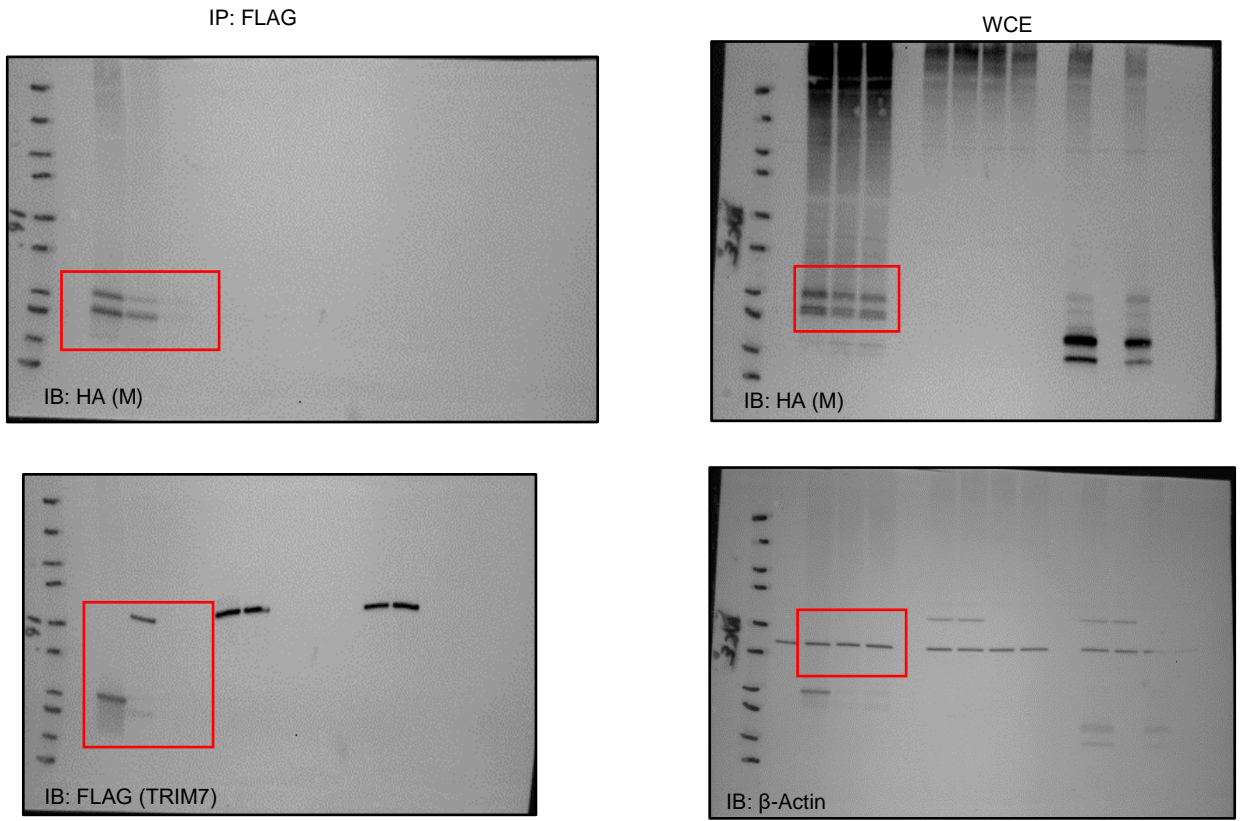

Figure S1e uncropped unprocessed immunoblots

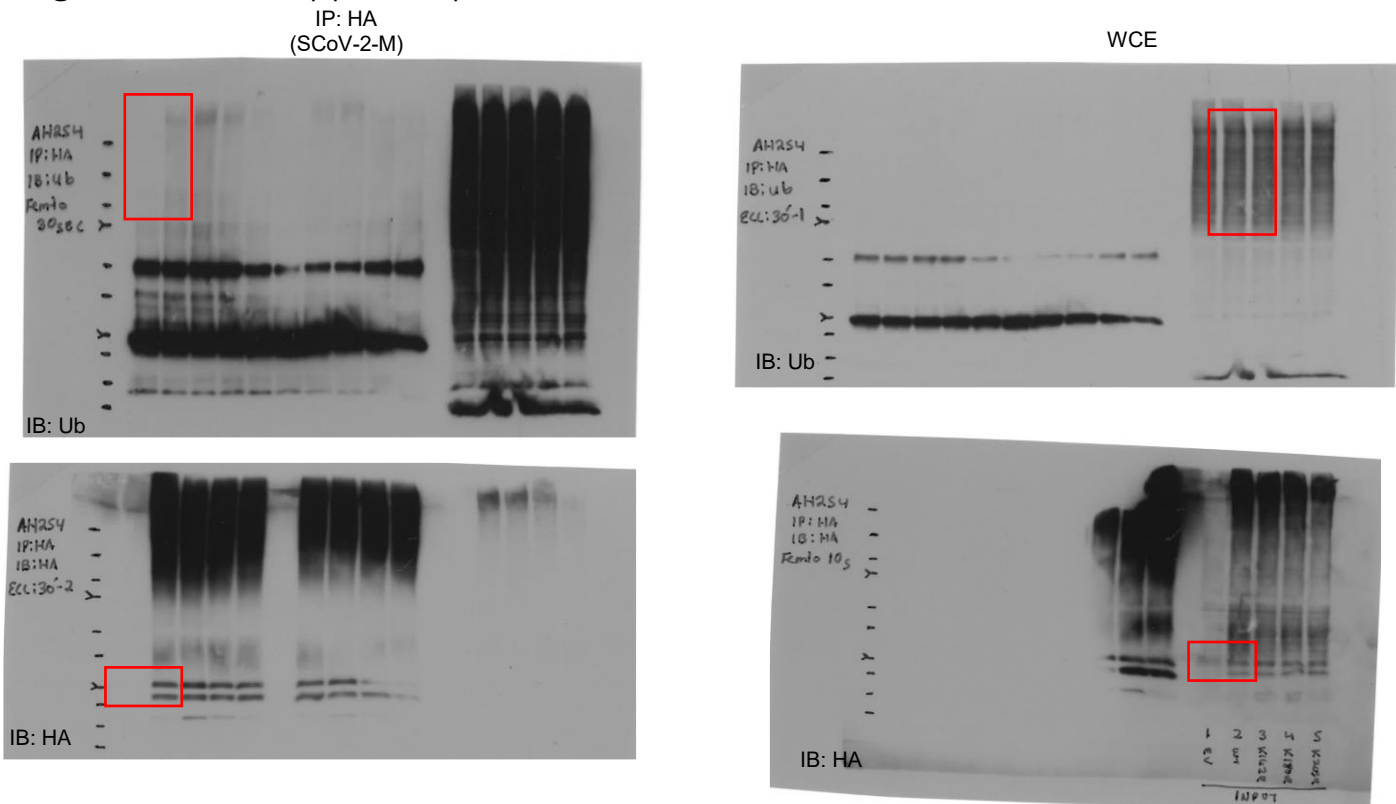



Figure S1f uncropped unprocessed immunoblots

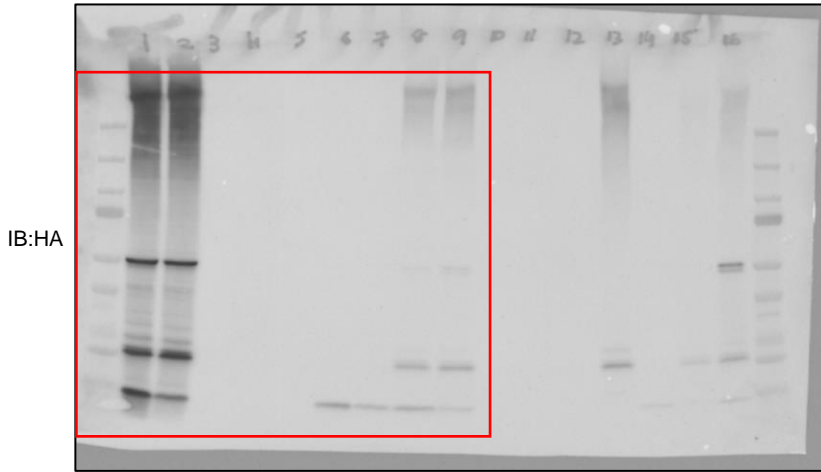

Figure S1h uncropped unprocessed immunoblots

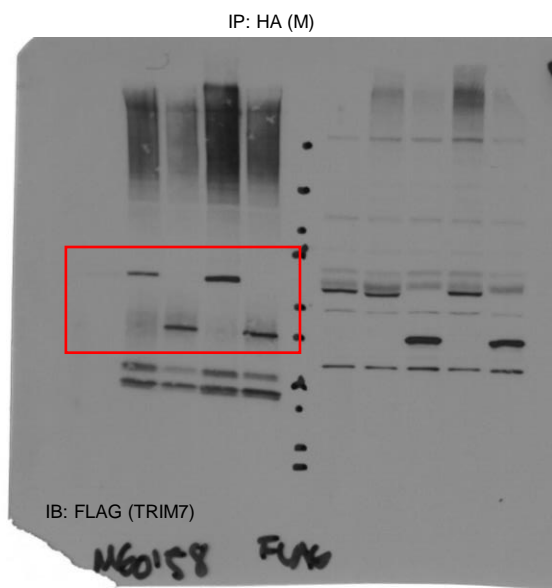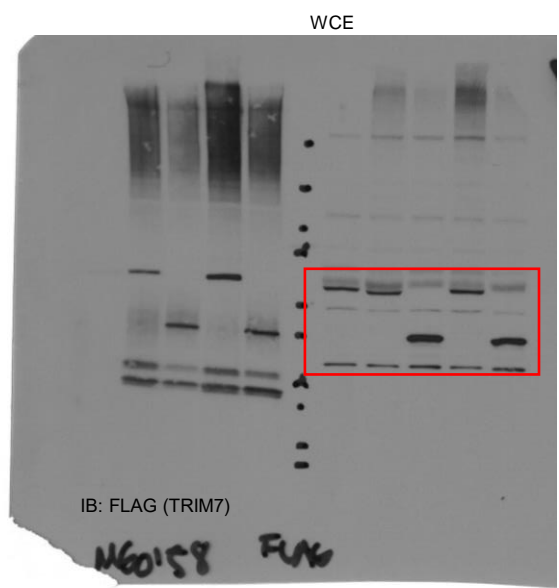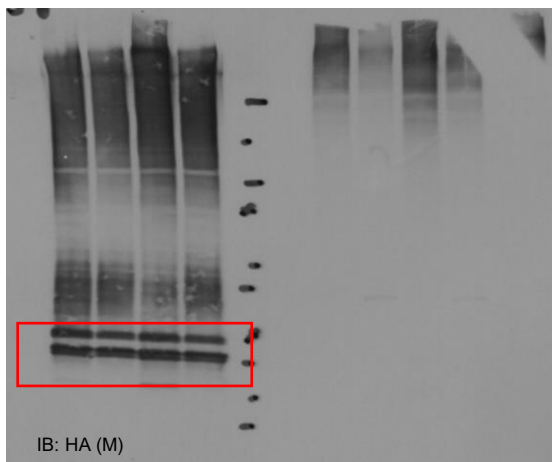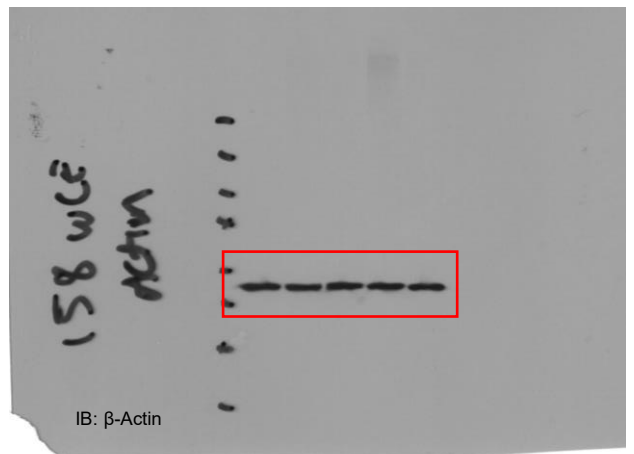

Figure S1i uncropped unprocessed immunoblots

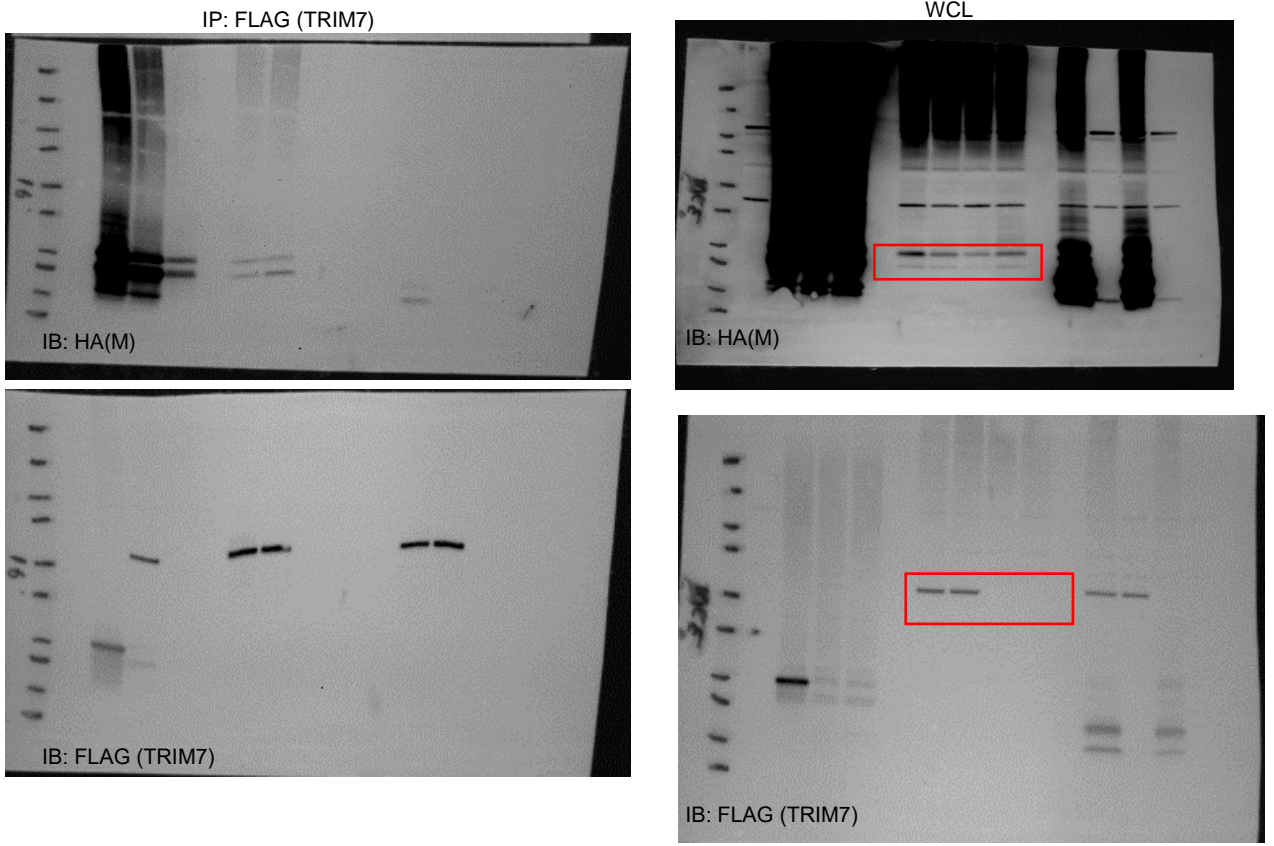

Figure S1j uncropped unprocessed immunoblots

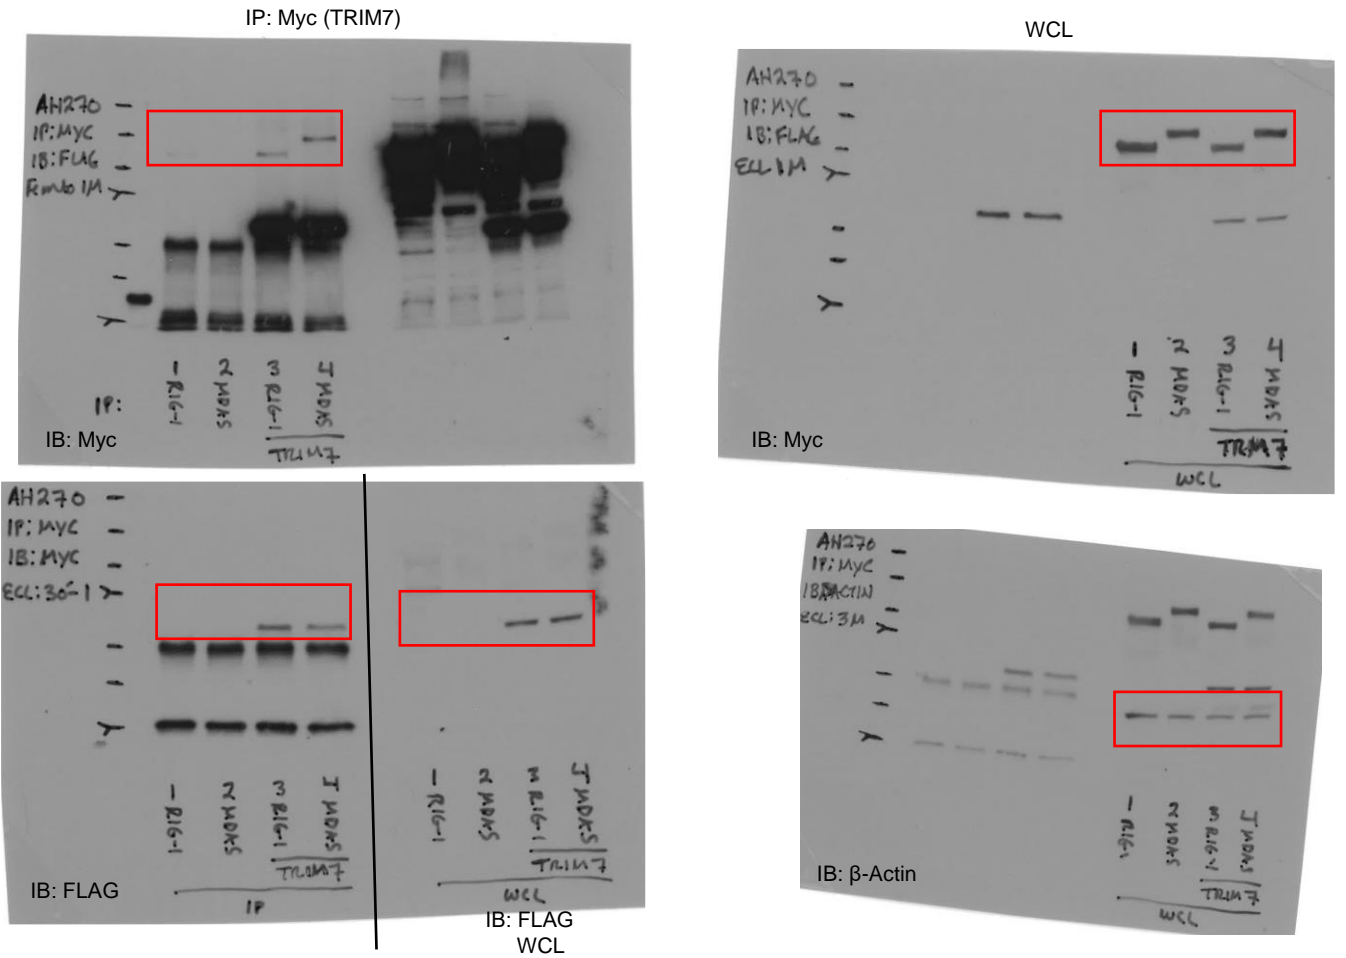

Figure S2k uncropped unprocessed immunoblots

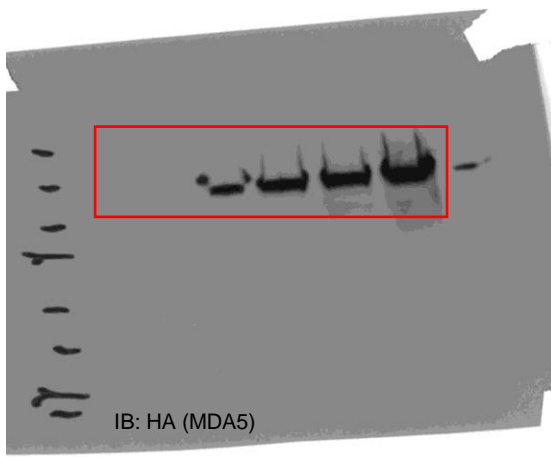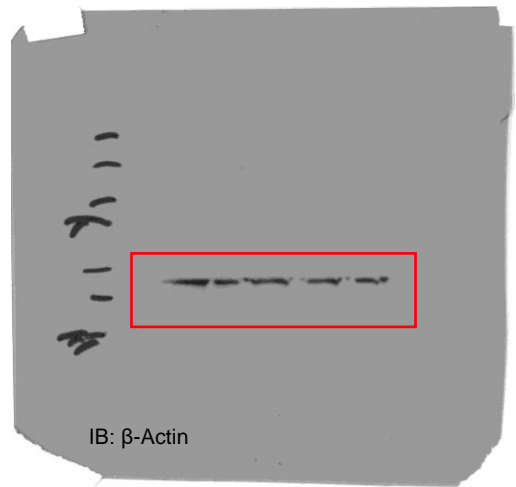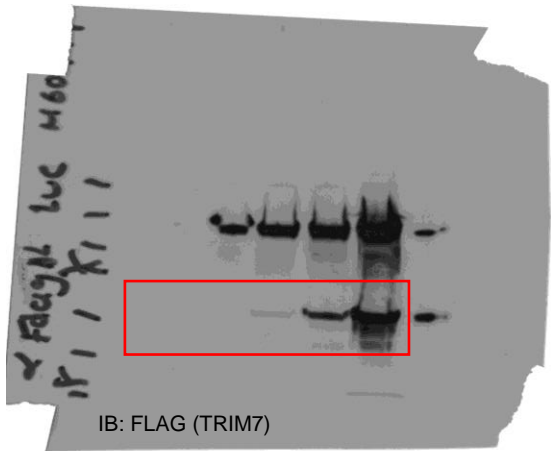

Figure S2l uncropped unprocessed immunoblots

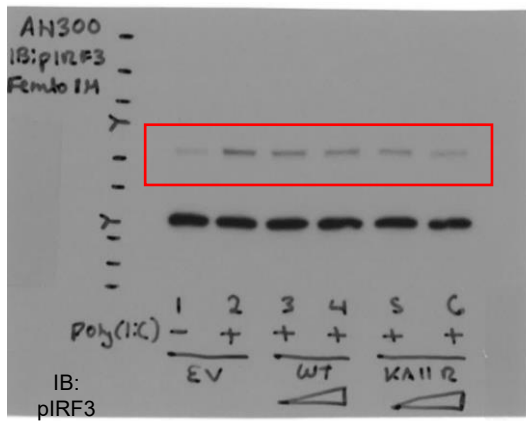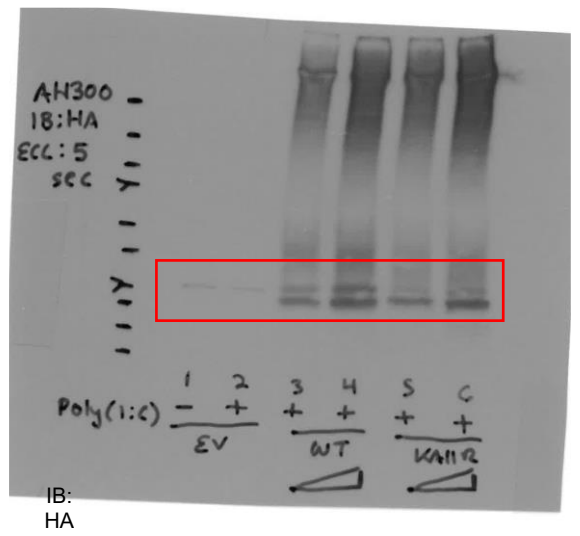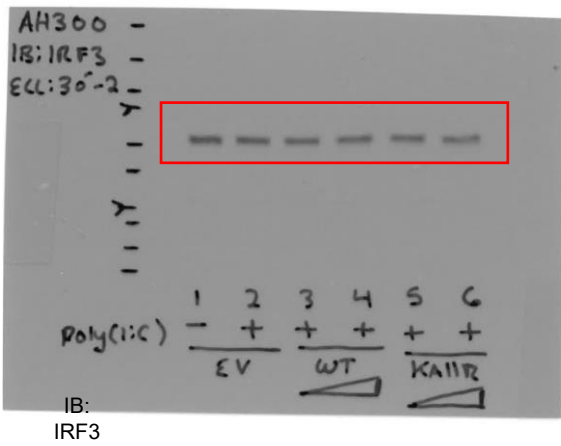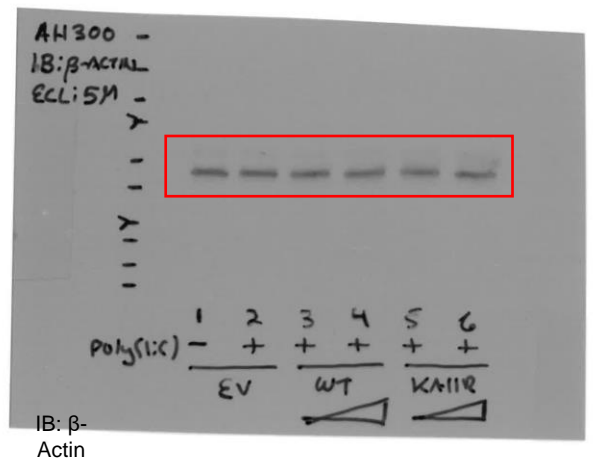

Figure S2m uncropped unprocessed immunoblots

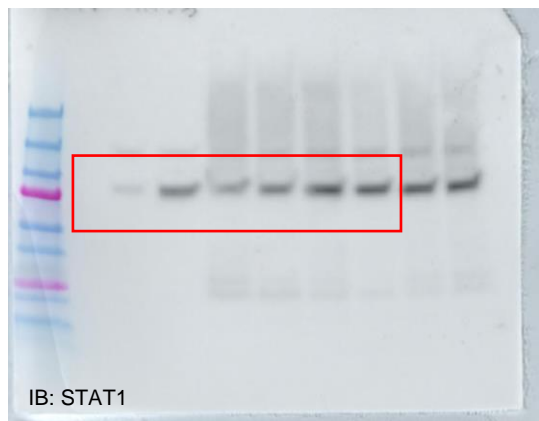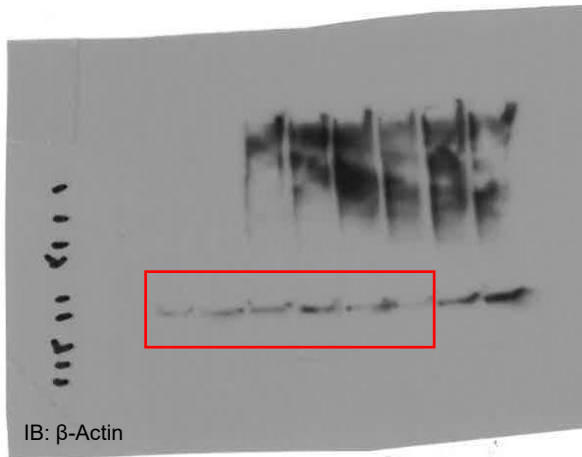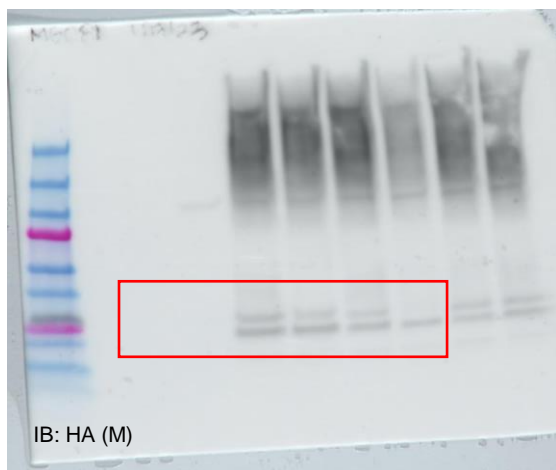

Figure S2m uncropped unprocessed immunoblots

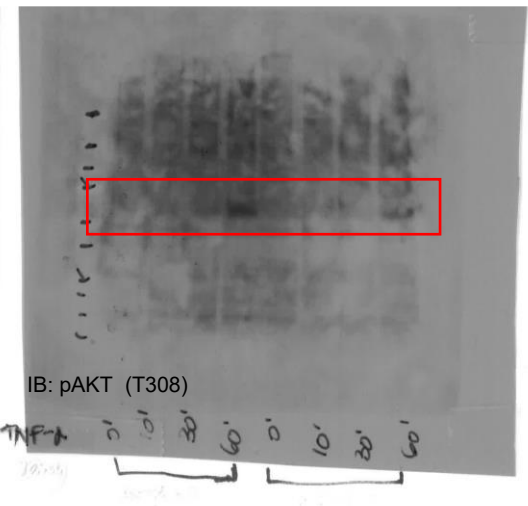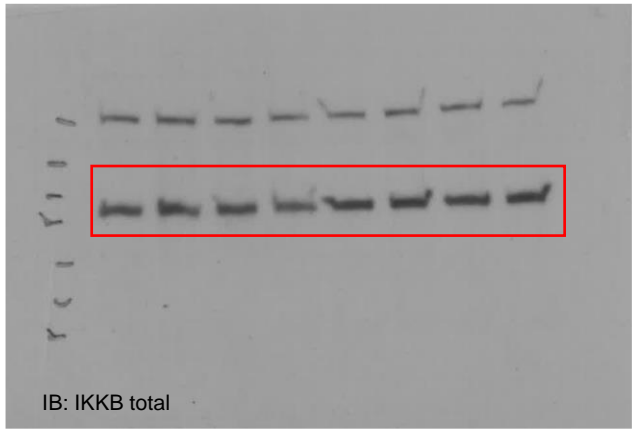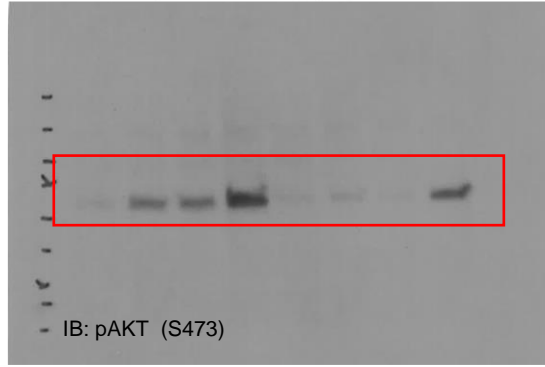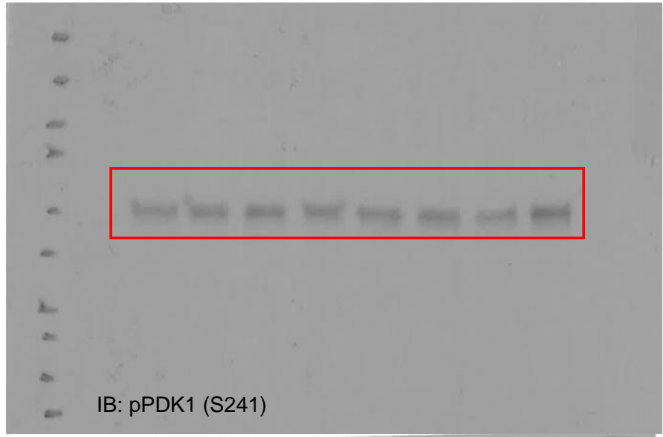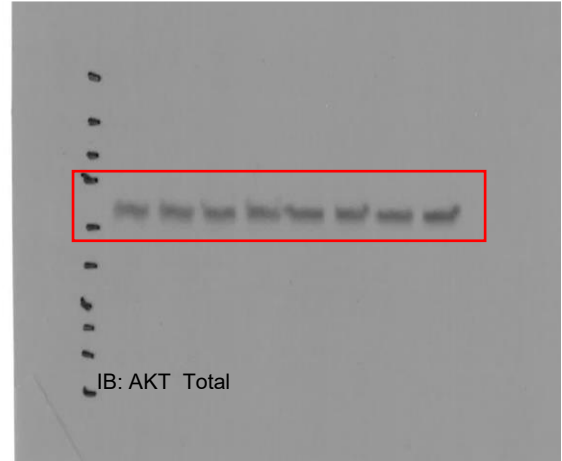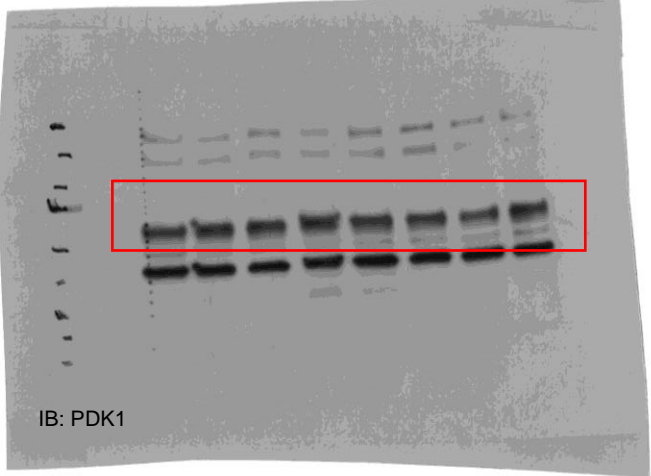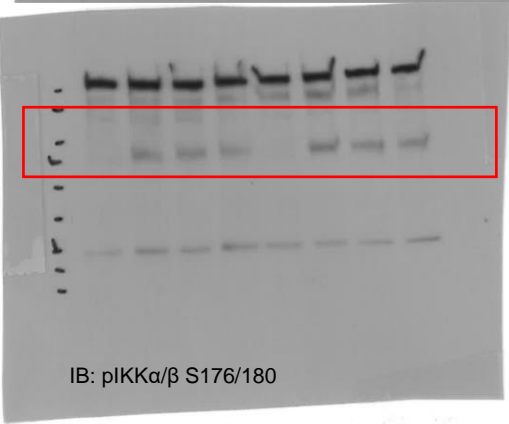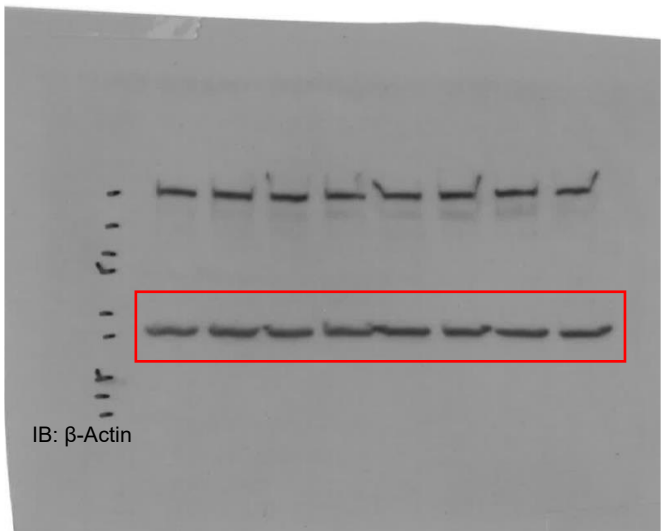

Figure S6k uncropped unprocessed immunoblots

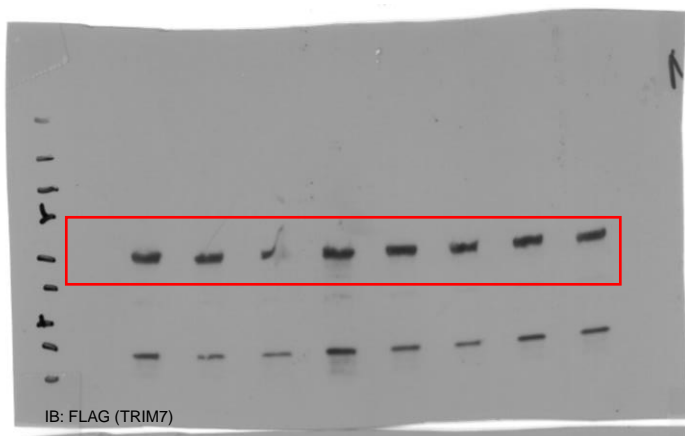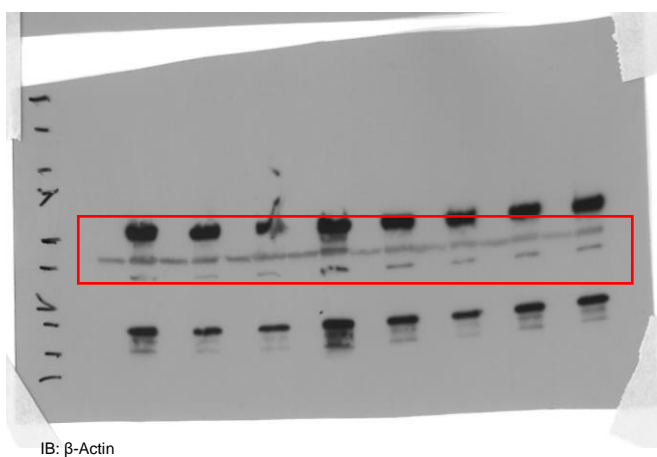

Supplement: 41467_2024_54762_MOESM1_ESM.pdf [file 41467_2024_54762_MOESM1_ESM.pdf]
