# Supplementary material for: TRIM7 ubiquitinates SARS-CoV-2 membrane protein to limit apoptosis and viral replication
Source: PubMed Central journal article supplement — Nat Commun. 2024 Nov 30;15:10438. doi: 10.1038/s41467-024-54762-5 (PMC11608229; doi:10.1038/s41467-024-54762-5), 2024-11-30
Supplement: 41467_2024_54762_MOESM2_ESM.pdf [file 41467_2024_54762_MOESM2_ESM.pdf]

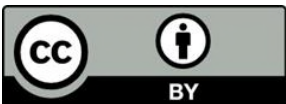

**Open Access** This file is licensed under a Creative Commons Attribution 4.0 International License, which permits use, sharing, adaptation, distribution and reproduction in any medium or format, as long as you give appropriate credit to the original author(s) and the source, provide a link to the Creative Commons license, and indicate if changes were made. In the cases where the authors are anonymous, such as is the case for the reports of anonymous peer reviewers, author attribution should be to 'Anonymous Referee' followed by a clear attribution to the source work. The images or other third party material in this file are included in the article's Creative Commons license, unless indicated otherwise in a credit line to the material. If material is not included in the article's Creative Commons license and your intended use is not permitted by statutory regulation or exceeds the permitted use, you will need to obtain permission directly from the copyright holder. To view a copy of this license, visit <http://creativecommons.org/licenses/by/4.0/>.

**Editorial Note:** This manuscript has been previously reviewed at another journal that is not operating a transparent peer review scheme. This document only contains reviewer comments and rebuttal letters for versions considered at Nature Communications.

## **REVIEWERS' COMMENTS**

Reviewer #1 (Remarks to the Author):

The authors have addressed or clarified the previous points raised. The manuscript is greatly improved.

Reviewer #2 (Remarks to the Author):

The authors have addressed my comments, corrected mislabelled figures, and provided extra data to support their conclusions. The text has been updated to reflect these changes.
